# Supplementary material
Source: Research Square preprint supplement (doi:10.21203/rs.3.rs-9533147/v1)
Supplement: Supplementary file 1 [file f6f1b51b4ff1384fac457121.xlsx]

## Sheet: Sheet1
Date	Number	Sex Male=0,Female=1	Age	Age group (0-40]=1,(40-50]=2,(50-60]=3,(60-70]=4,>70=5	Diverticulosis Yes=1,No=0	Right	Left	Cecum Yes=1,No=0	Ascending Yes=1,No=0	Transverse Yes=1,No=0	Descending Yes=1,No=0	Sigmoid Yes=1,No=0	Rectum Yes=1,No=0	Complication
2021-01-02 02:40:00	001100198600	0	41	2	0			0	0	0	0	0	0
2021-01-04 07:53:00	001074329200	1	38	1	0			0	0	0	0	0	0
2021-01-04 07:55:00	000615531400	1	54	3	0			0	0	0	0	0	0
2021-01-04 08:01:00	001099121500	1	53	3	0			0	0	0	0	0	0
2021-01-04 08:04:00	300002202565	0	67	4	0			0	0	0	0	0	0
2021-01-04 08:11:00	000862005000	1	67	4	0			0	0	0	0	0	0
2021-01-04 08:26:00	001099621800	0	51	3	0			0	0	0	0	0	0
2021-01-04 08:29:00	300002761980	0	49	2	0			0	0	0	0	0	0
2021-01-04 08:37:00	001076338900	0	79	5	0			0	0	0	0	0	0
2021-01-04 08:44:00	500001321940	1	38	1	0			0	0	0	0	0	0
2021-01-04 08:44:00	300002997120	0	64	4	0			0	0	0	0	0	0
2021-01-04 08:59:00	300001930878	0	47	2	0			0	0	0	0	0	0
2021-01-04 09:00:00	300003504593	0	35	1	0			0	0	0	0	0	0
2021-01-04 09:05:00	500000411408	0	72	5	0			0	0	0	0	0	0
2021-01-04 09:13:00	000973051600	1	72	5	0			0	0	0	0	0	0
2021-01-04 09:14:00	300002719751	1	33	1	0			0	0	0	0	0	0
2021-01-04 09:15:00	001097297700	1	18	1	0			0	0	0	0	0	0
2021-01-04 09:16:00	300000281898	1	42	2	0			0	0	0	0	0	0
2021-01-04 09:28:00	000996518900	1	42	2	0			0	0	0	0	0	0
2021-01-04 09:36:00	001078257900	1	42	2	0			0	0	0	0	0	0
2021-01-04 09:37:00	300003604329	0	46	2	0			0	0	0	0	0	0
2021-01-04 09:37:00	001100552000	0	42	2	0			0	0	0	0	0	0
2021-01-04 09:46:00	300003185727	0	32	1	0			0	0	0	0	0	0
2021-01-04 09:50:00	14148919	0	39	1	0			0	0	0	0	0	0
2021-01-04 09:50:00	001098697900	0	63	4	0			0	0	0	0	0	0
2021-01-04 09:51:00	001100141400	1	60	3	0			0	0	0	0	0	0
2021-01-04 09:55:00	300002697914	0	46	2	0			0	0	0	0	0	0
2021-01-04 09:58:00	500001228891	1	64	4	0			0	0	0	0	0	0
2021-01-04 10:00:00	300002869993	1	49	2	0			0	0	0	0	0	0
2021-01-04 10:25:00	500001323276	1	47	2	0			0	0	0	0	0	0
2021-01-04 10:27:00	300003019636	0	67	4	0			0	0	0	0	0	0
2021-01-04 10:29:00	300002750350	1	69	4	0			0	0	0	0	0	0
2021-01-04 10:38:00	001061344600	0	31	1	0			0	0	0	0	0	0
2021-01-04 10:42:00	300003237085	0	40	1	0			0	0	0	0	0	0
2021-01-04 10:44:00	500000747737	1	54	3	1	1		1	0	0	0	0	0
2021-01-04 10:46:00	500000865823	1	55	3	0			0	0	0	0	0	0
2021-01-04 10:50:00	200000019196	1	48	2	0			0	0	0	0	0	0
2021-01-04 11:02:00	300000164748	0	67	4	0			0	0	0	0	0	0
2021-01-04 11:23:00	500001318307	1	48	2	0			0	0	0	0	0	0
2021-01-04 11:26:00	500000669279	1	46	2	0			0	0	0	0	0	0
2021-01-04 14:01:00	500001320983	0	82	5	0			0	0	0	0	0	0
2021-01-04 14:02:00	500001319835	1	35	1	0			0	0	0	0	0	0
2021-01-04 14:04:00	500001322126	1	47	2	0			0	0	0	0	0	0
2021-01-04 14:04:00	500001322370	0	38	1	0			0	0	0	0	0	0
2021-01-04 14:04:00	500000548941	1	46	2	0			0	0	0	0	0	0
2021-01-04 14:10:00	300003482050	1	58	3	0			0	0	0	0	0	0
2021-01-04 14:13:00	500000610174	0	34	1	0			0	0	0	0	0	0
2021-01-04 14:15:00	500001322648	0	54	3	0			0	0	0	0	0	0
2021-01-04 14:17:00	300002412669	0	60	3	0			0	0	0	0	0	0
2021-01-04 14:19:00	500001317896	0	39	1	0			0	0	0	0	0	0
2021-01-04 14:23:00	300002110224	1	50	2	0			0	0	0	0	0	0
2021-01-04 14:25:00	500001322369	1	63	4	0			0	0	0	0	0	0
2021-01-04 14:31:00	500001323792	1	50	2	0			0	0	0	0	0	0
2021-01-04 14:31:00	500000978493	0	37	1	0			0	0	0	0	0	0
2021-01-04 14:32:00	300003582726	1	32	1	0			0	0	0	0	0	0
2021-01-04 14:38:00	500000688394	0	33	1	0			0	0	0	0	0	0
2021-01-04 14:39:00	500001304616	1	29	1	0			0	0	0	0	0	0
2021-01-04 14:42:00	300002337773	0	57	3	0			0	0	0	0	0	0
2021-01-04 14:44:00	300000410010	0	44	2	0			0	0	0	0	0	0
2021-01-04 14:44:00	500001254498	1	48	2	0			0	0	0	0	0	0
2021-01-04 14:45:00	500001320466	1	38	1	0			0	0	0	0	0	0
2021-01-04 14:47:00	500000755968	1	66	4	0			0	0	0	0	0	0
2021-01-04 14:52:00	300002519020	1	27	1	0			0	0	0	0	0	0
2021-01-04 14:54:00	500001322540	0	50	2	0			0	0	0	0	0	0
2021-01-04 14:56:00	200000090050	0	30	1	0			0	0	0	0	0	0
2021-01-04 14:57:00	500001324296	0	34	1	0			0	0	0	0	0	0
2021-01-04 15:00:00	300003401372	0	56	3	0			0	0	0	0	0	0
2021-01-04 15:01:00	500001322664	0	31	1	0			0	0	0	0	0	0
2021-01-04 15:03:00	300000216426	1	39	1	0			0	0	0	0	0	0
2021-01-04 15:03:00	500000818458	0	40	1	0			0	0	0	0	0	0
2021-01-04 15:11:00	500001214906	1	56	3	0			0	0	0	0	0	0
2021-01-04 15:12:00	13128315	0	60	3	1	1		0	1	0	0	0	0
2021-01-04 15:14:00	500001270616	0	32	1	0			0	0	0	0	0	0
2021-01-04 15:14:00	500001325434	0	66	4	0			0	0	0	0	0	0
2021-01-04 15:16:00	500001322709	1	38	1	0			0	0	0	0	0	0
2021-01-04 15:18:00	500000355301	1	47	2	0			0	0	0	0	0	0
2021-01-04 15:18:00	500001324815	1	52	3	1	1		1	0	0	0	0	0
2021-01-04 15:19:00	300001192690	1	49	2	0			0	0	0	0	0	0
2021-01-04 15:20:00	500001232196	1	47	2	0			0	0	0	0	0	0
2021-01-04 15:30:00	500001164670	0	31	1	0			0	0	0	0	0	0
2021-01-04 15:30:00	300000025880	0	33	1	0			0	0	0	0	0	0
2021-01-04 15:36:00	500001323974	1	72	5	0			0	0	0	0	0	0
2021-01-04 15:38:00	500001324817	0	63	4	0			0	0	0	0	0	0
2021-01-04 15:39:00	300003154332	0	29	1	0			0	0	0	0	0	0
2021-01-04 15:39:00	300000875529	1	49	2	0			0	0	0	0	0	0
2021-01-04 15:42:00	500001322911	1	73	5	0			0	0	0	0	0	0
2021-01-04 15:44:00	500001324911	1	53	3	0			0	0	0	0	0	0
2021-01-04 15:46:00	300003521428	1	50	2	0			0	0	0	0	0	0
2021-01-04 15:47:00	500001323605	0	49	2	0			0	0	0	0	0	0
2021-01-04 15:49:00	500000727879	1	26	1	0			0	0	0	0	0	0
2021-01-04 15:50:00	500001278174	0	52	3	0			0	0	0	0	0	0
2021-01-04 15:50:00	500000112129	0	67	4	0			0	0	0	0	0	0
2021-01-04 15:52:00	11555510	0	59	3	0			0	0	0	0	0	0
2021-01-04 15:52:00	300001737391	0	55	3	0			0	0	0	0	0	0
2021-01-04 15:56:00	500001320399	1	18	1	0			0	0	0	0	0	0
2021-01-04 15:58:00	500001325098	1	65	4	0			0	0	0	0	0	0
2021-01-04 16:03:00	300003086653	1	27	1	0			0	0	0	0	0	0
2021-01-04 16:08:00	300000427826	1	33	1	0			0	0	0	0	0	0
2021-01-04 16:08:00	300003455180	0	32	1	0			0	0	0	0	0	0
2021-01-04 16:10:00	300000848304	0	52	3	0			0	0	0	0	0	0
2021-01-04 16:10:00	500000911724	0	65	4	0			0	0	0	0	0	0
2021-01-04 16:16:00	300001440606	0	48	2	0			0	0	0	0	0	0
2021-01-04 16:21:00	300001925441	1	33	1	0			0	0	0	0	0	0
2021-01-04 16:32:00	300002119775	0	36	1	0			0	0	0	0	0	0
2021-01-05 07:57:00	001084676800	0	69	4	0			0	0	0	0	0	0
2021-01-05 07:59:00	001101039200	0	42	2	0			0	0	0	0	0	0
2021-01-05 08:02:00	500001327014	0	52	3	0			0	0	0	0	0	0
2021-01-05 08:04:00	001100529100	1	71	5	0			0	0	0	0	0	0
2021-01-05 08:09:00	无	0	71	5	0			0	0	0	0	0	0
2021-01-05 08:17:00	000634011300	0	44	2	0			0	0	0	0	0	0
2021-01-05 08:22:00	001100843000	0	31	1	0			0	0	0	0	0	0
2021-01-05 08:29:00	300002046999	0	38	1	0			0	0	0	0	0	0
2021-01-05 08:32:00	300003148996	1	29	1	0			0	0	0	0	0	0
2021-01-05 08:34:00	300003535955	0	36	1	0			0	0	0	0	0	0
2021-01-05 08:38:00	300002482354	1	47	2	0			0	0	0	0	0	0
2021-01-05 08:39:00	000938199800	0	75	5	0			0	0	0	0	0	0
2021-01-05 08:39:00	300002511568	0	66	4	0			0	0	0	0	0	0
2021-01-05 08:41:00	300000169516	1	62	4	0			0	0	0	0	0	0
2021-01-05 08:53:00	001100236900	0	51	3	0			0	0	0	0	0	0
2021-01-05 08:59:00	500001160777	1	43	2	0			0	0	0	0	0	0
2021-01-05 09:13:00	300000620736	1	47	2	0			0	0	0	0	0	0
2021-01-05 09:13:00	000853248200	1	46	2	0			0	0	0	0	0	0
2021-01-05 09:17:00	000328236200	0	67	4	0			0	0	0	0	0	0
2021-01-05 09:33:00	300002266279	1	57	3	0			0	0	0	0	0	0
2021-01-05 09:34:00	500001327081	0	43	2	1	1		1	1	0	0	0	0
2021-01-05 09:36:00	001100938100	1	58	3	0			0	0	0	0	0	0
2021-01-05 09:36:00	000229667900	1	46	2	0			0	0	0	0	0	0
2021-01-05 09:43:00	13152063	1	47	2	0			0	0	0	0	0	0
2021-01-05 09:45:00	001046455600	0	63	4	0			0	0	0	0	0	0
2021-01-05 09:46:00	000907965300	0	47	2	0			0	0	0	0	0	0
2021-01-05 09:51:00	500000040555	1	58	3	0			0	0	0	0	0	0
2021-01-05 09:51:00	500001303167	1	18	1	0			0	0	0	0	0	0
2021-01-05 10:05:00	000947778700	0	49	2	0			0	0	0	0	0	0
2021-01-05 10:05:00	001100610000	0	79	5	0			0	0	0	0	0	0
2021-01-05 10:08:00	300003033119	0	52	3	0			0	0	0	0	0	0
2021-01-05 10:13:00	001100519200	1	52	3	0			0	0	0	0	0	0
2021-01-05 10:21:00	300002817326	0	39	1	0			0	0	0	0	0	0
2021-01-05 10:35:00	300002725148	0	47	2	0			0	0	0	0	0	0
2021-01-05 10:50:00	000156396500	1	42	2	0			0	0	0	0	0	0
2021-01-05 10:51:00	500000345033	0	69	4	0			0	0	0	0	0	0
2021-01-05 10:57:00	300002579997	0	22	1	0			0	0	0	0	0	0
2021-01-05 11:10:00	500001096574	0	73	5	0			0	0	0	0	0	0
2021-01-05 11:33:00	500001326846	1	64	4	0			0	0	0	0	0	0
2021-01-05 11:47:00	001100863300	1	64	4	0			0	0	0	0	0	0
2021-01-06 07:58:00	300002336648	1	56	3	0			0	0	0	0	0	0
2021-01-06 08:10:00	04137	0	34	1	0			0	0	0	0	0	0
2021-01-06 08:18:00	500001323128	1	48	2	1	1		1	0	0	0	0	0
2021-01-06 08:23:00	001100951100	0	57	3	0			0	0	0	0	0	0
2021-01-06 08:41:00	001084988600	0	49	2	0			0	0	0	0	0	0
2021-01-06 08:44:00	300003538669	1	46	2	1	1		0	1	0	0	0	0
2021-01-06 08:49:00	500001324895	1	31	1	0			0	0	0	0	0	0
2021-01-06 09:04:00	001090763600	1	51	3	0			0	0	0	0	0	0
2021-01-06 09:06:00	500000640675	0	43	2	0			0	0	0	0	0	0
2021-01-06 09:13:00	300002211366	0	27	1	0			0	0	0	0	0	0
2021-01-06 09:21:00	05292	1	25	1	0			0	0	0	0	0	0
2021-01-06 09:32:00	000740424000	1	49	2	0			0	0	0	0	0	0
2021-01-06 09:38:00	000846180900	1	52	3	0			0	0	0	0	0	0
2021-01-06 09:49:00	300002849365	0	47	2	0			0	0	0	0	0	0
2021-01-06 09:58:00	500001034485	1	64	4	0			0	0	0	0	0	0
2021-01-06 09:59:00	300003577815	1	57	3	0			0	0	0	0	0	0
2021-01-06 10:23:00	500001329171	1	48	2	0			0	0	0	0	0	0
2021-01-06 10:28:00	001101035500	1	84	5	0			0	0	0	0	0	0
2021-01-06 10:39:00	300000125810	0	38	1	0			0	0	0	0	0	0
2021-01-06 10:39:00	500001322472	0	45	2	0			0	0	0	0	0	0
2021-01-06 10:41:00	300001038672	1	72	5	0			0	0	0	0	0	0
2021-01-06 10:51:00	001042906000	0	52	3	0			0	0	0	0	0	0
2021-01-06 10:55:00	000750475800	0	23	1	0			0	0	0	0	0	0
2021-01-06 10:56:00	500001322586	0	65	4	0			0	0	0	0	0	0
2021-01-06 11:03:00	300003628622	1	76	5	0			0	0	0	0	0	0
2021-01-06 11:07:00	500001329832	0	28	1	0			0	0	0	0	0	0
2021-01-06 11:07:00	001099400200	1	45	2	1	1		0	1	0	0	0	0
2021-01-06 11:22:00	300000119565	0	36	1	0			0	0	0	0	0	0
2021-01-06 11:25:00	500001325382	0	22	1	0			0	0	0	0	0	0
2021-01-06 11:29:00	500000126947	0	34	1	0			0	0	0	0	0	0
2021-01-06 11:35:00	500001328464	0	38	1	0			0	0	0	0	0	0
2021-01-06 11:42:00	001075103800	1	48	2	0			0	0	0	0	0	0
2021-01-06 11:56:00	500001329570	0	56	3	0			0	0	0	0	0	0
2021-01-06 11:58:00	500000123926	0	48	2	0			0	0	0	0	0	0
2021-01-06 12:18:00	500001009868	1	42	2	0			0	0	0	0	0	0
2021-01-06 14:01:00	200000066115	1	54	3	0			0	0	0	0	0	0
2021-01-06 14:02:00	500001278667	0	43	2	0			0	0	0	0	0	0
2021-01-06 14:05:00	300002640516	0	49	2	0			0	0	0	0	0	0
2021-01-06 14:06:00	500000860021	0	43	2	0			0	0	0	0	0	0
2021-01-06 14:06:00	500001325893	0	67	4	0			0	0	0	0	0	0
2021-01-06 14:08:00	300001992877	1	32	1	0			0	0	0	0	0	0
2021-01-06 14:10:00	300002047032	1	47	2	0			0	0	0	0	0	0
2021-01-06 14:11:00	500001325781	0	49	2	0			0	0	0	0	0	0
2021-01-06 14:26:00	500000852159	0	32	1	0			0	0	0	0	0	0
2021-01-06 14:29:00	500001325942	0	54	3	0			0	0	0	0	0	0
2021-01-06 14:32:00	500001314467	1	44	2	0			0	0	0	0	0	0
2021-01-06 14:32:00	500000972167	1	30	1	0			0	0	0	0	0	0
2021-01-06 14:38:00	500001327697	0	43	2	0			0	0	0	0	0	0
2021-01-06 14:39:00	500001320260	0	48	2	0			0	0	0	0	0	0
2021-01-06 14:46:00	500001327135	1	56	3	0			0	0	0	0	0	0
2021-01-06 14:47:00	300003226770	1	45	2	0			0	0	0	0	0	0
2021-01-06 14:48:00	200000096279	0	64	4	0			0	0	0	0	0	0
2021-01-06 14:53:00	500000192671	1	66	4	0			0	0	0	0	0	0
2021-01-06 15:02:00	000921107300	0	82	5	0			0	0	0	0	0	0
2021-01-06 15:03:00	300002889358	1	76	5	0			0	0	0	0	0	0
2021-01-06 15:04:00	500000396940	0	31	1	1	1		1	0	0	0	0	0
2021-01-06 15:23:00	300000711872	1	54	3	0			0	0	0	0	0	0
2021-01-06 15:23:00	300003093783	1	34	1	0			0	0	0	0	0	0
2021-01-06 15:24:00	500001322422	1	43	2	0			0	0	0	0	0	0
2021-01-06 15:29:00	300000735765	0	58	3	1	1		1	0	0	0	0	0
2021-01-06 15:32:00	500001329212	1	61	4	0			0	0	0	0	0	0
2021-01-06 15:33:00	500001321881	0	45	2	0			0	0	0	0	0	0
2021-01-06 15:41:00	300001949244	1	43	2	0			0	0	0	0	0	0
2021-01-06 15:42:00	500001327343	0	44	2	0			0	0	0	0	0	0
2021-01-06 15:49:00	13708116	1	51	3	0			0	0	0	0	0	0
2021-01-06 15:51:00	500000167587	1	70	4	0			0	0	0	0	0	0
2021-01-06 15:51:00	300001945765	0	46	2	0			0	0	0	0	0	0
2021-01-06 15:59:00	300001066565	0	21	1	0			0	0	0	0	0	0
2021-01-06 16:03:00	300001897153	0	33	1	0			0	0	0	0	0	0
2021-01-06 16:05:00	300002533609	1	43	2	0			0	0	0	0	0	0
2021-01-06 16:15:00	500001325574	1	55	3	0			0	0	0	0	0	0
2021-01-06 16:18:00	300002404120	1	58	3	0			0	0	0	0	0	0
2021-01-06 16:18:00	300003152415	1	38	1	0			0	0	0	0	0	0
2021-01-06 16:18:00	300003533857	0	57	3	0			0	0	0	0	0	0
2021-01-06 16:21:00	500001327675	0	27	1	0			0	0	0	0	0	0
2021-01-06 16:28:00	500000872707	1	48	2	0			0	0	0	0	0	0
2021-01-06 16:31:00	300003097526	0	41	2	0			0	0	0	0	0	0
2021-01-06 16:31:00	500000168096	0	71	5	0			0	0	0	0	0	0
2021-01-06 16:43:00	300002582694	0	24	1	0			0	0	0	0	0	0
2021-01-06 16:45:00	500001328924	1	19	1	0			0	0	0	0	0	0
2021-01-06 16:48:00	300002805427	0	44	2	0			0	0	0	0	0	0
2021-01-06 16:49:00	300001041411	1	56	3	0			0	0	0	0	0	0
2021-01-06 16:53:00	500001326657	0	33	1	0			0	0	0	0	0	0
2021-01-06 16:56:00	500001234822	0	31	1	0			0	0	0	0	0	0
2021-01-06 16:59:00	300003386758	1	67	4	0			0	0	0	0	0	0
2021-01-06 16:59:00	500001118149	1	50	2	0			0	0	0	0	0	0
2021-01-06 16:59:00	300001056156	0	65	4	0			0	0	0	0	0	0
2021-01-06 17:00:00	300000958666	1	53	3	0			0	0	0	0	0	0
2021-01-06 17:01:00	300003136284	0	33	1	0			0	0	0	0	0	0
2021-01-06 17:03:00	500001326526	1	69	4	0			0	0	0	0	0	0
2021-01-06 17:09:00	300002351819	0	63	4	0			0	0	0	0	0	0
2021-01-06 17:12:00	300000282192	1	57	3	0			0	0	0	0	0	0
2021-01-06 17:13:00	500001329274	1	68	4	0			0	0	0	0	0	0
2021-01-06 17:14:00	500001328880	0	59	3	0			0	0	0	0	0	0
2021-01-07 07:56:00	000863726300	0	61	4	0			0	0	0	0	0	0
2021-01-07 07:58:00	500001324757	0	35	1	0			0	0	0	0	0	0
2021-01-07 08:00:00	001101391400	0	38	1	0			0	0	0	0	0	0
2021-01-07 08:08:00	001064705300	1	47	2	0			0	0	0	0	0	0
2021-01-07 08:10:00	500000095039	1	36	1	0			0	0	0	0	0	0
2021-01-07 08:42:00	000857257300	1	41	2	0			0	0	0	0	0	0
2021-01-07 09:06:00	300001563728	1	63	4	0			0	0	0	0	0	0
2021-01-07 09:08:00	500001330892	1	72	5	0			0	0	0	0	0	0
2021-01-07 09:11:00	001100356300	0	36	1	0			0	0	0	0	0	0
2021-01-07 09:16:00	300003276616	1	57	3	0			0	0	0	0	0	0
2021-01-07 09:17:00	300003184696	1	41	2	0			0	0	0	0	0	0
2021-01-07 09:22:00	300000013004	0	41	2	0			0	0	0	0	0	0
2021-01-07 09:28:00	500001329830	1	36	1	0			0	0	0	0	0	0
2021-01-07 09:31:00	300003028109	1	52	3	0			0	0	0	0	0	0
2021-01-07 09:34:00	300002600568	1	46	2	0			0	0	0	0	0	0
2021-01-07 09:37:00	500001329680	0	50	2	0			0	0	0	0	0	0
2021-01-07 09:39:00	500001330568	0	50	2	0			0	0	0	0	0	0
2021-01-07 09:41:00	300003152541	0	59	3	1	1		1	0	0	0	0	0
2021-01-07 09:52:00	300002360313	0	47	2	0			0	0	0	0	0	0
2021-01-07 09:59:00	300000422683	1	46	2	0			0	0	0	0	0	0
2021-01-07 10:06:00	500001133550	0	50	2	0			0	0	0	0	0	0
2021-01-07 10:08:00	000571244000	0	42	2	0			0	0	0	0	0	0
2021-01-07 10:19:00	500000035908	0	42	2	0			0	0	0	0	0	0
2021-01-07 10:23:00	000738795100	0	57	3	0			0	0	0	0	0	0
2021-01-07 10:31:00	300003056506	0	40	1	0			0	0	0	0	0	0
2021-01-07 10:33:00	500001328964	1	20	1	0			0	0	0	0	0	0
2021-01-07 10:33:00	500001330636	0	30	1	0			0	0	0	0	0	0
2021-01-07 10:42:00	000823824800	0	56	3	0			0	0	0	0	0	0
2021-01-07 10:47:00	300001391631	1	31	1	0			0	0	0	0	0	0
2021-01-07 10:47:00	300000918065	1	53	3	0			0	0	0	0	0	0
2021-01-07 10:50:00	001101004900	1	47	2	0			0	0	0	0	0	0
2021-01-07 10:52:00	500001322705	0	42	2	0			0	0	0	0	0	0
2021-01-07 14:03:00	300001220268	0	53	3	0			0	0	0	0	0	0
2021-01-07 14:04:00	500001029672	0	33	1	0			0	0	0	0	0	0
2021-01-07 14:05:00	500001328912	0	49	2	0			0	0	0	0	0	0
2021-01-07 14:24:00	300000799869	0	45	2	0			0	0	0	0	0	0
2021-01-07 14:33:00	300002938327	1	38	1	0			0	0	0	0	0	0
2021-01-07 14:37:00	300003218213	0	53	3	0			0	0	0	0	0	0
2021-01-07 14:38:00	300001376756	1	51	3	0			0	0	0	0	0	0
2021-01-07 14:47:00	500000742586	0	47	2	0			0	0	0	0	0	0
2021-01-07 14:50:00	300002441755	1	35	1	0			0	0	0	0	0	0
2021-01-07 15:01:00	300002638109	1	29	1	0			0	0	0	0	0	0
2021-01-07 15:05:00	500001330964	1	51	3	0			0	0	0	0	0	0
2021-01-07 15:06:00	300000914635	0	72	5	0			0	0	0	0	0	0
2021-01-07 15:06:00	500000980143	1	29	1	0			0	0	0	0	0	0
2021-01-07 15:09:00	300002266394	1	30	1	0			0	0	0	0	0	0
2021-01-07 15:12:00	500000885893	0	59	3	0			0	0	0	0	0	0
2021-01-07 15:17:00	10928998	1	63	4	0			0	0	0	0	0	0
2021-01-07 15:19:00	300003414630	1	66	4	0			0	0	0	0	0	0
2021-01-07 15:25:00	300001853163	1	68	4	0			0	0	0	0	0	0
2021-01-07 15:31:00	300003223308	1	53	3	0			0	0	0	0	0	0
2021-01-07 15:37:00	500001330428	1	45	2	0			0	0	0	0	0	0
2021-01-07 15:38:00	500001330970	0	35	1	0			0	0	0	0	0	0
2021-01-07 15:44:00	500001331043	0	45	2	0			0	0	0	0	0	0
2021-01-07 15:44:00	001025728200	0	37	1	0			0	0	0	0	0	0
2021-01-07 15:54:00	300003439639	1	55	3	0			0	0	0	0	0	0
2021-01-07 15:55:00	500001331059	0	50	2	0			0	0	0	0	0	0
2021-01-07 15:57:00	500000804990	1	53	3	0			0	0	0	0	0	0
2021-01-07 15:59:00	11809835	0	62	4	0			0	0	0	0	0	0
2021-01-07 16:09:00	300001247687	1	62	4	0			0	0	0	0	0	0
2021-01-07 16:10:00	500001331292	1	30	1	0			0	0	0	0	0	0
2021-01-07 16:15:00	500001328407	1	48	2	0			0	0	0	0	0	0
2021-01-07 16:20:00	300003222371	0	48	2	0			0	0	0	0	0	0
2021-01-07 16:26:00	700472241200	0	37	1	0			0	0	0	0	0	0
2021-01-07 16:29:00	300002853418	1	41	2	0			0	0	0	0	0	0
2021-01-07 16:43:00	500001331496	0	20	1	0			0	0	0	0	0	0
2021-01-08 07:54:00	000563838000	0	43	2	0			0	0	0	0	0	0
2021-01-08 08:03:00	001100648800	1	72	5	0			0	0	0	0	0	0
2021-01-08 08:04:00	300000607571	0	64	4	0			0	0	0	0	0	0
2021-01-08 08:33:00	500001329870	0	66	4	0			0	0	0	0	0	0
2021-01-08 08:35:00	001092176500	0	46	2	0			0	0	0	0	0	0
2021-01-08 08:37:00	500001143619	1	55	3	0			0	0	0	0	0	0
2021-01-08 08:41:00	300001747420	0	30	1	0			0	0	0	0	0	0
2021-01-08 08:48:00	001099518700	1	37	1	0			0	0	0	0	0	0
2021-01-08 08:54:00	300001815187	1	66	4	0			0	0	0	0	0	0
2021-01-08 09:02:00	500000918198	0	50	2	0			0	0	0	0	0	0
2021-01-08 09:12:00	000613087600	1	52	3	0			0	0	0	0	0	0
2021-01-08 09:19:00	001007801700	1	61	4	0			0	0	0	0	0	0
2021-01-08 09:22:00	500000389958	1	45	2	0			0	0	0	0	0	0
2021-01-08 09:33:00	001101458300	1	35	1	0			0	0	0	0	0	0
2021-01-08 09:35:00	001021216600	1	47	2	0			0	0	0	0	0	0
2021-01-08 09:40:00	500001331102	0	53	3	0			0	0	0	0	0	0
2021-01-08 09:42:00	300000299412	1	49	2	0			0	0	0	0	0	0
2021-01-08 09:53:00	500001332456	0	43	2	0			0	0	0	0	0	0
2021-01-08 10:00:00	000653747100	1	68	4	0			0	0	0	0	0	0
2021-01-08 10:00:00	500000487742	0	53	3	0			0	0	0	0	0	0
2021-01-08 10:05:00	000778787200	1	52	3	0			0	0	0	0	0	0
2021-01-08 10:05:00	14043942	0	65	4	0			0	0	0	0	0	0
2021-01-08 10:12:00	001100700500	1	31	1	1	1		1	0	0	0	0	0
2021-01-08 10:28:00	500000840121	0	47	2	0			0	0	0	0	0	0
2021-01-08 10:33:00	300000522605	1	35	1	0			0	0	0	0	0	0
2021-01-08 10:35:00	000578137000	1	52	3	0			0	0	0	0	0	0
2021-01-08 10:41:00	300000207128	1	47	2	0			0	0	0	0	0	0
2021-01-08 10:50:00	001092266600	1	53	3	0			0	0	0	0	0	0
2021-01-08 10:53:00	001100357600	0	20	1	0			0	0	0	0	0	0
2021-01-08 10:56:00	000948172800	0	46	2	0			0	0	0	0	0	0
2021-01-08 10:59:00	500001072431	1	34	1	0			0	0	0	0	0	0
2021-01-08 11:11:00	500000230999	1	56	3	0			0	0	0	0	0	0
2021-01-08 11:11:00	001078822400	0	48	2	0			0	0	0	0	0	0
2021-01-08 11:18:00	300003563973	0	64	4	0			0	0	0	0	0	0
2021-01-08 14:06:00	500001332225	1	69	4	0			0	0	0	0	0	0
2021-01-08 14:07:00	300003382536	1	64	4	0			0	0	0	0	0	0
2021-01-08 14:08:00	500001332275	1	66	4	0			0	0	0	0	0	0
2021-01-08 14:16:00	500000327376	1	49	2	0			0	0	0	0	0	0
2021-01-08 14:20:00	500001165503	0	40	1	0			0	0	0	0	0	0
2021-01-08 14:21:00	500001144200	1	59	3	0			0	0	0	0	0	0
2021-01-08 14:27:00	500001270765	1	45	2	0			0	0	0	0	0	0
2021-01-08 14:28:00	500001332287	1	55	3	0			0	0	0	0	0	0
2021-01-08 14:31:00	000588241900	0	56	3	0			0	0	0	0	0	0
2021-01-08 14:32:00	300001227355	1	36	1	0			0	0	0	0	0	0
2021-01-08 14:39:00	000954708600	1	64	4	0			0	0	0	0	0	0
2021-01-08 14:41:00	500001323958	1	41	2	0			0	0	0	0	0	0
2021-01-08 14:42:00	300003541449	0	31	1	0			0	0	0	0	0	0
2021-01-08 14:43:00	500001160345	0	29	1	0			0	0	0	0	0	0
2021-01-08 14:47:00	13453523	0	57	3	0			0	0	0	0	0	0
2021-01-08 14:52:00	500001272514	0	35	1	0			0	0	0	0	0	0
2021-01-08 15:03:00	500001332210	0	57	3	0			0	0	0	0	0	0
2021-01-08 15:04:00	300003121408	0	45	2	0			0	0	0	0	0	0
2021-01-08 15:05:00	300002528576	1	42	2	0			0	0	0	0	0	0
2021-01-08 15:07:00	300001327865	1	52	3	0			0	0	0	0	0	0
2021-01-08 15:12:00	300002166336	1	44	2	0			0	0	0	0	0	0
2021-01-08 15:13:00	300001666459	1	52	3	0			0	0	0	0	0	0
2021-01-08 15:14:00	500000794008	0	56	3	0			0	0	0	0	0	0
2021-01-08 15:15:00	300002853764	1	37	1	0			0	0	0	0	0	0
2021-01-08 15:17:00	500000023826	1	57	3	1	1		1	0	0	0	0	0
2021-01-08 15:18:00	500001331398	1	38	1	0			0	0	0	0	0	0
2021-01-08 15:20:00	500001332599	0	52	3	0			0	0	0	0	0	0
2021-01-08 15:21:00	300003542849	0	53	3	0			0	0	0	0	0	0
2021-01-08 15:25:00	300000358742	1	43	2	0			0	0	0	0	0	0
2021-01-08 15:29:00	300003233986	0	18	1	0			0	0	0	0	0	0
2021-01-08 15:30:00	500000331196	0	61	4	0			0	0	0	0	0	0
2021-01-08 15:32:00	500001036983	1	27	1	0			0	0	0	0	0	0
2021-01-08 15:34:00	500001331862	0	22	1	0			0	0	0	0	0	0
2021-01-08 15:35:00	500001331360	0	64	4	0			0	0	0	0	0	0
2021-01-08 15:39:00	500001333020	1	41	2	0			0	0	0	0	0	0
2021-01-11 07:58:00	001070025900	1	58	3	0			0	0	0	0	0	0
2021-01-11 07:59:00	500001334588	0	48	2	0			0	0	0	0	0	0
2021-01-11 07:59:00	000783578300	1	55	3	0			0	0	0	0	0	0
2021-01-11 08:25:00	500001070675	1	73	5	1	1		0	1	1	0	0	0
2021-01-11 08:26:00	300001731534	0	43	2	0			0	0	0	0	0	0
2021-01-11 08:26:00	500001328506	1	52	3	0			0	0	0	0	0	0
2021-01-11 08:27:00	00929	0	56	3	0			0	0	0	0	0	0
2021-01-11 08:43:00	001010256100	0	75	5	0			0	0	0	0	0	0
2021-01-11 08:48:00	001073423600	0	46	2	0			0	0	0	0	0	0
2021-01-11 08:58:00	500001330610	1	55	3	0			0	0	0	0	0	0
2021-01-11 08:58:00	000957223800	1	76	5	1	1		0	1	0	0	0	0
2021-01-11 08:59:00	500000366972	0	52	3	1	1		1	1	0	0	0	0
2021-01-11 09:00:00	500000650228	0	30	1	0			0	0	0	0	0	0
2021-01-11 09:01:00	500001333451	0	45	2	0			0	0	0	0	0	0
2021-01-11 09:15:00	000684002800	1	73	5	0			0	0	0	0	0	0
2021-01-11 09:18:00	300003565108	1	49	2	0			0	0	0	0	0	0
2021-01-11 09:27:00	300000318613	0	47	2	0			0	0	0	0	0	0
2021-01-11 09:28:00	000688691600	1	62	4	0			0	0	0	0	0	0
2021-01-11 09:43:00	13125506	1	40	1	0			0	0	0	0	0	0
2021-01-11 09:52:00	187950	1	32	1	0			0	0	0	0	0	0
2021-01-11 09:58:00	500001008983	0	49	2	0			0	0	0	0	0	0
2021-01-11 09:58:00	300003402190	0	42	2	0			0	0	0	0	0	0
2021-01-11 10:06:00	300002466694	1	50	2	0			0	0	0	0	0	0
2021-01-11 10:29:00	001034001400	1	24	1	0			0	0	0	0	0	0
2021-01-11 10:48:00	001099258900	0	56	3	0			0	0	0	0	0	0
2021-01-11 10:52:00	500001334334	1	72	5	0			0	0	0	0	0	0
2021-01-11 14:01:00	500001299332	0	64	4	0			0	0	0	0	0	0
2021-01-11 14:06:00	500001333343	1	40	1	0			0	0	0	0	0	0
2021-01-11 14:09:00	300001320413	1	44	2	0			0	0	0	0	0	0
2021-01-11 14:14:00	500001334137	0	39	1	0			0	0	0	0	0	0
2021-01-11 14:24:00	12940830	1	55	3	0			0	0	0	0	0	0
2021-01-11 14:25:00	00869	1	48	2	0			0	0	0	0	0	0
2021-01-11 14:37:00	300003308534	1	35	1	0			0	0	0	0	0	0
2021-01-11 14:38:00	500001201243	1	42	2	0			0	0	0	0	0	0
2021-01-11 14:41:00	300003190283	0	34	1	0			0	0	0	0	0	0
2021-01-11 14:44:00	300002949495	1	53	3	0			0	0	0	0	0	0
2021-01-11 14:51:00	13510729	1	63	4	0			0	0	0	0	0	0
2021-01-11 14:55:00	500001057356	1	43	2	0			0	0	0	0	0	0
2021-01-11 14:55:00	500001331857	1	66	4	0			0	0	0	0	0	0
2021-01-11 14:56:00	500001174881	1	23	1	0			0	0	0	0	0	0
2021-01-11 14:57:00	500000174769	0	45	2	0			0	0	0	0	0	0
2021-01-11 14:58:00	500000245163	0	30	1	0			0	0	0	0	0	0
2021-01-11 14:58:00	13448235	1	50	2	0			0	0	0	0	0	0
2021-01-11 15:06:00	500001315382	1	37	1	0			0	0	0	0	0	0
2021-01-11 15:08:00	500000119588	1	43	2	0			0	0	0	0	0	0
2021-01-11 15:10:00	500001332328	1	55	3	0			0	0	0	0	0	0
2021-01-11 15:13:00	300001935075	1	44	2	0			0	0	0	0	0	0
2021-01-11 15:14:00	500001335069	1	45	2	0			0	0	0	0	0	0
2021-01-11 15:16:00	300001346795	0	37	1	0			0	0	0	0	0	0
2021-01-11 15:17:00	500001334811	1	64	4	0			0	0	0	0	0	0
2021-01-11 15:22:00	300001807736	1	48	2	0			0	0	0	0	0	0
2021-01-11 15:23:00	500000159542	1	27	1	0			0	0	0	0	0	0
2021-01-11 15:25:00	500000283247	1	54	3	0			0	0	0	0	0	0
2021-01-11 15:28:00	10153775	1	74	5	0			0	0	0	0	0	0
2021-01-11 15:37:00	500001330381	0	49	2	0			0	0	0	0	0	0
2021-01-11 15:39:00	300002314943	1	50	2	0			0	0	0	0	0	0
2021-01-11 15:40:00	700535179100	1	76	5	0			0	0	0	0	0	0
2021-01-11 15:40:00	500001334806	0	47	2	0			0	0	0	0	0	0
2021-01-11 15:41:00	300003590301	1	58	3	0			0	0	0	0	0	0
2021-01-11 15:48:00	500001336030	0	53	3	0			0	0	0	0	0	0
2021-01-11 15:48:00	300002064022	0	56	3	0			0	0	0	0	0	0
2021-01-11 15:49:00	500001335006	0	56	3	0			0	0	0	0	0	0
2021-01-11 15:51:00	500001335004	0	48	2	0			0	0	0	0	0	0
2021-01-11 15:53:00	300003460444	1	55	3	0			0	0	0	0	0	0
2021-01-11 15:55:00	500001329834	0	41	2	0			0	0	0	0	0	0
2021-01-11 15:58:00	13497172	0	52	3	0			0	0	0	0	0	0
2021-01-11 16:00:00	300003266180	0	47	2	0			0	0	0	0	0	0
2021-01-11 16:02:00	300001706154	1	50	2	1	1		0	1	0	0	0	0
2021-01-11 16:04:00	300001366728	1	41	2	0			0	0	0	0	0	0
2021-01-11 16:10:00	500001335003	1	47	2	0			0	0	0	0	0	0
2021-01-11 16:14:00	500001331609	1	57	3	0			0	0	0	0	0	0
2021-01-11 16:15:00	500001336102	1	43	2	0			0	0	0	0	0	0
2021-01-11 16:15:00	200000054474	1	56	3	0			0	0	0	0	0	0
2021-01-11 16:23:00	300003475056	0	48	2	0			0	0	0	0	0	0
2021-01-11 16:25:00	300002812118	1	34	1	0			0	0	0	0	0	0
2021-01-11 16:27:00	500001334638	0	36	1	0			0	0	0	0	0	0
2021-01-11 16:30:00	500000123970	0	44	2	0			0	0	0	0	0	0
2021-01-11 16:33:00	300003431264	0	25	1	0			0	0	0	0	0	0
2021-01-11 16:34:00	300003454007	1	29	1	0			0	0	0	0	0	0
2021-01-11 16:51:00	300003316131	1	63	4	0			0	0	0	0	0	0
2021-01-12 07:54:00	500001333804	1	50	2	0			0	0	0	0	0	0
2021-01-12 08:20:00	300003010130	0	35	1	0			0	0	0	0	0	0
2021-01-12 08:22:00	300001904041	0	54	3	0			0	0	0	0	0	0
2021-01-12 08:33:00	300003170695	0	34	1	0			0	0	0	0	0	0
2021-01-12 08:41:00	200000102282	0	49	2	0			0	0	0	0	0	0
2021-01-12 08:47:00	300003002945	1	36	1	0			0	0	0	0	0	0
2021-01-12 08:48:00	300001967433	0	25	1	0			0	0	0	0	0	0
2021-01-12 08:54:00	001080952400	0	52	3	0			0	0	0	0	0	0
2021-01-12 08:59:00	001102128200	1	66	4	1	1		0	1	0	0	0	0
2021-01-12 09:08:00	001101841800	0	49	2	0			0	0	0	0	0	0
2021-01-12 09:19:00	500000356621	1	51	3	0			0	0	0	0	0	0
2021-01-12 09:21:00	300002691690	1	53	3	0			0	0	0	0	0	0
2021-01-12 09:28:00	500001337880	0	76	5	0			0	0	0	0	0	0
2021-01-12 09:38:00	500001338555	1	46	2	0			0	0	0	0	0	0
2021-01-12 09:40:00	300001588888	1	40	1	0			0	0	0	0	0	0
2021-01-12 09:42:00	001102229200	0	48	2	0			0	0	0	0	0	0
2021-01-12 09:48:00	500001334559	0	52	3	0			0	0	0	0	0	0
2021-01-12 09:50:00	300003082325	0	43	2	0			0	0	0	0	0	0
2021-01-12 09:55:00	001102359400	1	44	2	0			0	0	0	0	0	0
2021-01-12 09:57:00	500000986464	0	60	3	0			0	0	0	0	0	0
2021-01-12 10:07:00	500001326683	1	47	2	0			0	0	0	0	0	0
2021-01-12 10:10:00	300002458239	0	51	3	0			0	0	0	0	0	0
2021-01-12 10:10:00	500000143424	1	58	3	0			0	0	0	0	0	0
2021-01-12 10:17:00	500000795826	0	31	1	0			0	0	0	0	0	0
2021-01-12 10:20:00	500000245843	0	44	2	0			0	0	0	0	0	0
2021-01-12 10:31:00	300001352539	0	49	2	0			0	0	0	0	0	0
2021-01-12 10:32:00	001102084400	0	19	1	0			0	0	0	0	0	0
2021-01-12 10:51:00	300001590902	1	50	2	0			0	0	0	0	0	0
2021-01-12 10:57:00	13911518	0	61	4	0			0	0	0	0	0	0
2021-01-12 11:02:00	001100901600	1	73	5	0			0	0	0	0	0	0
2021-01-12 11:10:00	500000801490	1	32	1	0			0	0	0	0	0	0
2021-01-12 11:11:00	001101465900	0	45	2	0			0	0	0	0	0	0
2021-01-12 11:25:00	500000274877	0	49	2	0			0	0	0	0	0	0
2021-01-12 11:44:00	500000408256	0	24	1	0			0	0	0	0	0	0
2021-01-12 11:45:00	300000752687	0	35	1	0			0	0	0	0	0	0
2021-01-12 11:47:00	001055465200	0	73	5	0			0	0	0	0	0	0
2021-01-12 11:59:00	001031862100	1	23	1	0			0	0	0	0	0	0
2021-01-13 07:55:00	300002336557	1	43	2	0			0	0	0	0	0	0
2021-01-13 07:55:00	001101542600	1	84	5	0			0	0	0	0	0	0
2021-01-13 08:00:00	000950119300	0	47	2	1	1		0	1	0	0	0	0
2021-01-13 08:11:00	500000155726	0	47	2	0			0	0	0	0	0	0
2021-01-13 08:41:00	300003210890	1	64	4	0			0	0	0	0	0	0
2021-01-13 08:46:00	500001096205	0	46	2	0			0	0	0	0	0	0
2021-01-13 08:47:00	500001175462	0	20	1	0			0	0	0	0	0	0
2021-01-13 08:52:00	001102358200	0	58	3	0			0	0	0	0	0	0
2021-01-13 09:01:00	500001338266	1	34	1	0			0	0	0	0	0	0
2021-01-13 09:18:00	000604319400	0	54	3	0			0	0	0	0	0	0
2021-01-13 09:27:00	001031286400	1	80	5	0			0	0	0	0	0	0
2021-01-13 09:29:00	300003183045	1	38	1	0			0	0	0	0	0	0
2021-01-13 09:30:00	500001339225	1	45	2	0			0	0	0	0	0	0
2021-01-13 09:39:00	300002794884	1	41	2	0			0	0	0	0	0	0
2021-01-13 09:41:00	001092165500	1	34	1	0			0	0	0	0	0	0
2021-01-13 09:44:00	001102245700	1	68	4	0			0	0	0	0	0	0
2021-01-13 09:47:00	300003570793	1	40	1	0			0	0	0	0	0	0
2021-01-13 09:50:00	001102644300	0	58	3	0			0	0	0	0	0	0
2021-01-13 09:56:00	300002281202	0	54	3	0			0	0	0	0	0	0
2021-01-13 09:58:00	300001419224	1	52	3	0			0	0	0	0	0	0
2021-01-13 10:04:00	000719668200	0	42	2	0			0	0	0	0	0	0
2021-01-13 10:05:00	500001338502	0	34	1	1	1		1	0	0	0	0	0
2021-01-13 10:07:00	06046	1	34	1	0			0	0	0	0	0	0
2021-01-13 10:11:00	001018944600	1	74	5	0			0	0	0	0	0	0
2021-01-13 10:14:00	500001337790	1	31	1	0			0	0	0	0	0	0
2021-01-13 10:14:00	300002304779	0	72	5	1		1	0	0	0	1	0	0
2021-01-13 10:26:00	000747312300	0	58	3	1	1		1	1	1	0	0	0
2021-01-13 10:28:00	001102476000	1	63	4	0			0	0	0	0	0	0
2021-01-13 10:33:00	300003369768	0	46	2	0			0	0	0	0	0	0
2021-01-13 10:38:00	500001254103	0	26	1	0			0	0	0	0	0	0
2021-01-13 10:42:00	500000557452	0	28	1	0			0	0	0	0	0	0
2021-01-13 10:45:00	500001271689	1	24	1	0			0	0	0	0	0	0
2021-01-13 10:53:00	000556077800	1	49	2	0			0	0	0	0	0	0
2021-01-13 10:57:00	000966950900	1	61	4	0			0	0	0	0	0	0
2021-01-13 11:04:00	001099944700	0	67	4	0			0	0	0	0	0	0
2021-01-13 14:01:00	300001339817	1	57	3	0			0	0	0	0	0	0
2021-01-13 14:01:00	500001337124	0	62	4	0			0	0	0	0	0	0
2021-01-13 14:03:00	300001596202	0	67	4	0			0	0	0	0	0	0
2021-01-13 14:10:00	700535459900	1	63	4	0			0	0	0	0	0	0
2021-01-13 14:19:00	500001336897	1	63	4	0			0	0	0	0	0	0
2021-01-13 14:21:00	300003002796	1	66	4	0			0	0	0	0	0	0
2021-01-13 14:22:00	300001835883	0	55	3	1	1		0	1	0	0	0	0
2021-01-13 14:24:00	500000628257	1	30	1	0			0	0	0	0	0	0
2021-01-13 14:31:00	500001336297	1	45	2	0			0	0	0	0	0	0
2021-01-13 14:39:00	000639273000	0	72	5	0			0	0	0	0	0	0
2021-01-13 14:40:00	500000213745	1	37	1	0			0	0	0	0	0	0
2021-01-13 14:40:00	300001875437	1	71	5	0			0	0	0	0	0	0
2021-01-13 14:40:00	300000926888	0	42	2	0			0	0	0	0	0	0
2021-01-13 15:05:00	500001337489	0	71	5	0			0	0	0	0	0	0
2021-01-13 15:10:00	300003507099	1	60	3	0			0	0	0	0	0	0
2021-01-13 15:15:00	500001337197	1	46	2	0			0	0	0	0	0	0
2021-01-13 15:16:00	300003091216	0	54	3	0			0	0	0	0	0	0
2021-01-13 15:17:00	300003050175	0	52	3	0			0	0	0	0	0	0
2021-01-13 15:21:00	300002414339	0	35	1	1	1		0	1	0	0	0	0
2021-01-13 15:29:00	500001339035	0	35	1	0			0	0	0	0	0	0
2021-01-13 15:31:00	500000337816	1	36	1	0			0	0	0	0	0	0
2021-01-13 15:34:00	14134976	0	80	5	0			0	0	0	0	0	0
2021-01-13 15:35:00	500000074645	1	62	4	0			0	0	0	0	0	0
2021-01-13 15:38:00	500001323121	1	46	2	0			0	0	0	0	0	0
2021-01-13 15:43:00	500000666718	1	52	3	0			0	0	0	0	0	0
2021-01-13 15:45:00	500001048121	1	51	3	0			0	0	0	0	0	0
2021-01-13 15:46:00	500001332684	1	44	2	0			0	0	0	0	0	0
2021-01-13 15:46:00	300001537932	0	40	1	0			0	0	0	0	0	0
2021-01-13 15:48:00	300002139530	0	48	2	0			0	0	0	0	0	0
2021-01-13 15:56:00	500001337092	0	21	1	0			0	0	0	0	0	0
2021-01-13 15:58:00	500001339097	1	47	2	0			0	0	0	0	0	0
2021-01-13 16:02:00	300001300570	1	36	1	0			0	0	0	0	0	0
2021-01-13 16:03:00	300003070753	1	57	3	0			0	0	0	0	0	0
2021-01-13 16:03:00	500001341113	1	50	2	0			0	0	0	0	0	0
2021-01-13 16:04:00	500001338959	0	31	1	0			0	0	0	0	0	0
2021-01-13 16:08:00	500001339167	1	50	2	0			0	0	0	0	0	0
2021-01-13 16:10:00	500000634569	0	50	2	0			0	0	0	0	0	0
2021-01-13 16:11:00	300002679772	0	25	1	0			0	0	0	0	0	0
2021-01-13 16:16:00	300003473555	0	51	3	1	1		1	0	0	0	0	0
2021-01-13 16:18:00	500001339268	1	55	3	1	1		1	0	0	0	0	0
2021-01-13 16:23:00	300003201212	1	71	5	0			0	0	0	0	0	0
2021-01-13 16:25:00	300002493428	1	47	2	0			0	0	0	0	0	0
2021-01-13 16:26:00	500000160530	0	42	2	0			0	0	0	0	0	0
2021-01-14 07:56:00	000507142300	1	58	3	0			0	0	0	0	0	0
2021-01-14 08:12:00	300000919265	1	54	3	0			0	0	0	0	0	0
2021-01-14 08:22:00	500001341046	0	36	1	0			0	0	0	0	0	0
2021-01-14 08:35:00	000666238100	0	71	5	0			0	0	0	0	0	0
2021-01-14 08:43:00	500001341065	0	41	2	0			0	0	0	0	0	0
2021-01-14 08:50:00	001102695000	0	46	2	0			0	0	0	0	0	0
2021-01-14 08:50:00	500000318405	1	50	2	0			0	0	0	0	0	0
2021-01-14 08:52:00	001102277700	1	55	3	0			0	0	0	0	0	0
2021-01-14 08:55:00	500001341560	0	46	2	0			0	0	0	0	0	0
2021-01-14 09:01:00	000653991800	0	34	1	0			0	0	0	0	0	0
2021-01-14 09:10:00	500000184158	0	54	3	0			0	0	0	0	0	0
2021-01-14 09:17:00	500001334143	0	23	1	0			0	0	0	0	0	0
2021-01-14 09:28:00	001102868100	0	46	2	0			0	0	0	0	0	0
2021-01-14 09:38:00	300002323153	1	44	2	0			0	0	0	0	0	0
2021-01-14 09:41:00	001102875800	0	36	1	0			0	0	0	0	0	0
2021-01-14 09:57:00	000960314300	1	62	4	0			0	0	0	0	0	0
2021-01-14 10:00:00	001102573500	0	74	5	0			0	0	0	0	0	0
2021-01-14 10:02:00	500000975081	1	56	3	0			0	0	0	0	0	0
2021-01-14 10:02:00	500001340985	0	50	2	1	1		1	0	0	0	0	0
2021-01-14 10:12:00	500000394956	1	64	4	0			0	0	0	0	0	0
2021-01-14 10:16:00	000733614100	1	32	1	0			0	0	0	0	0	0
2021-01-14 10:34:00	500001324308	0	19	1	0			0	0	0	0	0	0
2021-01-14 10:37:00	000609036900	0	41	2	0			0	0	0	0	0	0
2021-01-14 11:02:00	300002330295	0	65	4	0			0	0	0	0	0	0
2021-01-14 14:10:00	500001335306	0	39	1	0			0	0	0	0	0	0
2021-01-14 14:13:00	500000511375	1	47	2	0			0	0	0	0	0	0
2021-01-14 14:13:00	500001339709	0	44	2	0			0	0	0	0	0	0
2021-01-14 14:15:00	500001255340	1	34	1	0			0	0	0	0	0	0
2021-01-14 14:20:00	500001339461	1	50	2	0			0	0	0	0	0	0
2021-01-14 14:31:00	500001339047	0	41	2	0			0	0	0	0	0	0
2021-01-14 14:34:00	500001337801	1	70	4	0			0	0	0	0	0	0
2021-01-14 14:34:00	500000741063	1	31	1	0			0	0	0	0	0	0
2021-01-14 14:38:00	300001636197	0	33	1	0			0	0	0	0	0	0
2021-01-14 14:40:00	500001334149	1	48	2	0			0	0	0	0	0	0
2021-01-14 14:40:00	500001339982	1	48	2	0			0	0	0	0	0	0
2021-01-14 14:41:00	500000129808	1	51	3	0			0	0	0	0	0	0
2021-01-14 14:43:00	300003204076	0	52	3	0			0	0	0	0	0	0
2021-01-14 14:43:00	300001283935	1	69	4	0			0	0	0	0	0	0
2021-01-14 14:45:00	500001071368	0	36	1	0			0	0	0	0	0	0
2021-01-14 14:52:00	500001333301	1	53	3	0			0	0	0	0	0	0
2021-01-14 14:55:00	300001243719	1	49	2	0			0	0	0	0	0	0
2021-01-14 14:56:00	300000876883	1	47	2	0			0	0	0	0	0	0
2021-01-14 14:58:00	500001339922	1	49	2	0			0	0	0	0	0	0
2021-01-14 14:59:00	500001337029	1	49	2	0			0	0	0	0	0	0
2021-01-14 15:04:00	300002793199	0	31	1	0			0	0	0	0	0	0
2021-01-14 15:07:00	300001569223	0	41	2	0			0	0	0	0	0	0
2021-01-14 15:10:00	500001340261	1	59	3	0			0	0	0	0	0	0
2021-01-14 15:11:00	500001336994	1	73	5	0			0	0	0	0	0	0
2021-01-14 15:14:00	300003327321	0	40	1	0			0	0	0	0	0	0
2021-01-14 15:16:00	500000094143	0	27	1	0			0	0	0	0	0	0
2021-01-14 15:17:00	300003350297	0	36	1	0			0	0	0	0	0	0
2021-01-14 15:20:00	500000222445	0	26	1	0			0	0	0	0	0	0
2021-01-14 15:22:00	300002878471	1	53	3	0			0	0	0	0	0	0
2021-01-14 15:23:00	500001340786	1	67	4	0			0	0	0	0	0	0
2021-01-14 15:23:00	500001340893	1	68	4	0			0	0	0	0	0	0
2021-01-14 15:29:00	300003600257	1	50	2	0			0	0	0	0	0	0
2021-01-14 15:29:00	300001926624	1	51	3	0			0	0	0	0	0	0
2021-01-14 15:33:00	300002734367	0	32	1	0			0	0	0	0	0	0
2021-01-14 15:34:00	500001341037	1	36	1	0			0	0	0	0	0	0
2021-01-14 15:34:00	500001334656	0	65	4	0			0	0	0	0	0	0
2021-01-14 15:40:00	300003243929	1	58	3	0			0	0	0	0	0	0
2021-01-14 15:42:00	500000292934	1	62	4	0			0	0	0	0	0	0
2021-01-14 15:43:00	500001340056	1	46	2	0			0	0	0	0	0	0
2021-01-14 15:44:00	300003294236	0	34	1	0			0	0	0	0	0	0
2021-01-14 15:48:00	500001331116	0	38	1	0			0	0	0	0	0	0
2021-01-14 15:49:00	300002303424	0	52	3	0			0	0	0	0	0	0
2021-01-14 15:59:00	300002100194	1	41	2	0			0	0	0	0	0	0
2021-01-14 16:07:00	300002674029	1	48	2	0			0	0	0	0	0	0
2021-01-14 16:11:00	300001852994	1	41	2	0			0	0	0	0	0	0
2021-01-14 16:12:00	300000967954	1	59	3	0			0	0	0	0	0	0
2021-01-14 16:12:00	500001338827	0	31	1	0			0	0	0	0	0	0
2021-01-14 16:24:00	300003078142	1	59	3	0			0	0	0	0	0	0
2021-01-14 16:24:00	500001042052	1	68	4	0			0	0	0	0	0	0
2021-01-14 16:29:00	300000672801	0	54	3	0			0	0	0	0	0	0
2021-01-15 07:58:00	001103107600	1	49	2	0			0	0	0	0	0	0
2021-01-15 08:02:00	001102847600	1	36	1	0			0	0	0	0	0	0
2021-01-15 08:02:00	500001339575	1	75	5	0			0	0	0	0	0	0
2021-01-15 08:12:00	001078830400	1	45	2	0			0	0	0	0	0	0
2021-01-15 08:17:00	300001335960	1	31	1	0			0	0	0	0	0	0
2021-01-15 08:19:00	500001341485	0	54	3	1	1		0	1	0	0	0	0
2021-01-15 08:32:00	500001342454	0	64	4	0			0	0	0	0	0	0
2021-01-15 08:34:00	001023332700	0	48	2	0			0	0	0	0	0	0
2021-01-15 08:35:00	001092418100	0	30	1	0			0	0	0	0	0	0
2021-01-15 08:38:00	500001342783	1	44	2	0			0	0	0	0	0	0
2021-01-15 08:40:00	500001342513	1	42	2	0			0	0	0	0	0	0
2021-01-15 08:51:00	000647158700	1	63	4	0			0	0	0	0	0	0
2021-01-15 08:53:00	300003587099	1	54	3	0			0	0	0	0	0	0
2021-01-15 08:54:00	001022004900	0	36	1	0			0	0	0	0	0	0
2021-01-15 09:03:00	500001332969	1	51	3	1	1		1	0	0	0	0	0
2021-01-15 09:08:00	001092278900	1	60	3	0			0	0	0	0	0	0
2021-01-15 09:08:00	300003523102	1	47	2	0			0	0	0	0	0	0
2021-01-15 09:09:00	500001343575	1	55	3	0			0	0	0	0	0	0
2021-01-15 09:11:00	500001342522	1	36	1	0			0	0	0	0	0	0
2021-01-15 09:18:00	500001340489	0	64	4	0			0	0	0	0	0	0
2021-01-15 09:23:00	000714320600	1	61	4	0			0	0	0	0	0	0
2021-01-15 09:23:00	500001342017	1	43	2	0			0	0	0	0	0	0
2021-01-15 09:49:00	500001341529	0	55	3	0			0	0	0	0	0	0
2021-01-15 09:59:00	001099676300	1	72	5	0			0	0	0	0	0	0
2021-01-15 10:00:00	500000710307	0	64	4	0			0	0	0	0	0	0
2021-01-15 10:04:00	500000264580	1	39	1	0			0	0	0	0	0	0
2021-01-15 10:05:00	500001341517	0	35	1	0			0	0	0	0	0	0
2021-01-15 10:06:00	000916660100	0	59	3	0			0	0	0	0	0	0
2021-01-15 10:14:00	500000732325	0	51	3	0			0	0	0	0	0	0
2021-01-15 10:22:00	500001343336	1	46	2	0			0	0	0	0	0	0
2021-01-15 10:25:00	000117309700	0	63	4	0			0	0	0	0	0	0
2021-01-15 10:30:00	001092224000	1	43	2	0			0	0	0	0	0	0
2021-01-15 10:34:00	001101140000	1	71	5	0			0	0	0	0	0	0
2021-01-15 10:35:00	000721677800	0	45	2	0			0	0	0	0	0	0
2021-01-15 10:49:00	500000925946	0	59	3	0			0	0	0	0	0	0
2021-01-15 10:51:00	13886647	1	37	1	0			0	0	0	0	0	0
2021-01-15 11:01:00	000847867500	0	47	2	1	1		1	0	0	0	0	0
2021-01-15 11:03:00	000954425300	0	53	3	0			0	0	0	0	0	0
2021-01-15 11:04:00	300002236901	1	61	4	0			0	0	0	0	0	0
2021-01-15 11:15:00	000963702500	0	41	2	0			0	0	0	0	0	0
2021-01-15 11:22:00	500001343323	0	26	1	0			0	0	0	0	0	0
2021-01-15 11:36:00	000401227500	0	51	3	0			0	0	0	0	0	0
2021-01-15 11:41:00	001102985300	1	32	1	0			0	0	0	0	0	0
2021-01-15 14:01:00	000798504200	0	36	1	0			0	0	0	0	0	0
2021-01-15 14:02:00	001102717000	1	53	3	0			0	0	0	0	0	0
2021-01-15 14:04:00	500001299443	1	42	2	0			0	0	0	0	0	0
2021-01-15 14:05:00	300001816128	0	44	2	0			0	0	0	0	0	0
2021-01-15 14:05:00	300000057043	0	31	1	0			0	0	0	0	0	0
2021-01-15 14:11:00	300003229224	0	58	3	0			0	0	0	0	0	0
2021-01-15 14:14:00	500001341919	0	35	1	0			0	0	0	0	0	0
2021-01-15 14:33:00	500001333813	1	50	2	0			0	0	0	0	0	0
2021-01-15 14:33:00	14052501	1	66	4	0			0	0	0	0	0	0
2021-01-15 14:34:00	300003301711	1	49	2	0			0	0	0	0	0	0
2021-01-15 14:35:00	500001334877	1	49	2	0			0	0	0	0	0	0
2021-01-15 14:38:00	300001119659	1	31	1	0			0	0	0	0	0	0
2021-01-15 14:46:00	300002772242	0	30	1	0			0	0	0	0	0	0
2021-01-15 14:49:00	300001172729	1	69	4	0			0	0	0	0	0	0
2021-01-15 14:52:00	300001065748	1	44	2	0			0	0	0	0	0	0
2021-01-15 14:53:00	300000667999	0	33	1	0			0	0	0	0	0	0
2021-01-15 14:55:00	500001342647	1	59	3	0			0	0	0	0	0	0
2021-01-15 14:58:00	500001340198	1	36	1	0			0	0	0	0	0	0
2021-01-15 15:00:00	500001212683	0	40	1	0			0	0	0	0	0	0
2021-01-15 15:02:00	500000898253	1	45	2	0			0	0	0	0	0	0
2021-01-15 15:06:00	500001338648	1	72	5	0			0	0	0	0	0	0
2021-01-15 15:10:00	500001336632	1	46	2	0			0	0	0	0	0	0
2021-01-15 15:13:00	300003093015	0	37	1	0			0	0	0	0	0	0
2021-01-15 15:15:00	001102971700	1	33	1	0			0	0	0	0	0	0
2021-01-15 15:15:00	500001342806	0	46	2	0			0	0	0	0	0	0
2021-01-15 15:18:00	300003066542	1	49	2	0			0	0	0	0	0	0
2021-01-15 15:20:00	500000996633	0	51	3	0			0	0	0	0	0	0
2021-01-15 15:27:00	300003569709	0	48	2	0			0	0	0	0	0	0
2021-01-15 15:30:00	500000246122	1	27	1	0			0	0	0	0	0	0
2021-01-15 15:33:00	300003284746	1	57	3	0			0	0	0	0	0	0
2021-01-15 15:41:00	500001334760	1	58	3	0			0	0	0	0	0	0
2021-01-15 15:43:00	500001322967	1	54	3	0			0	0	0	0	0	0
2021-01-15 15:44:00	001071757000	0	31	1	0			0	0	0	0	0	0
2021-01-15 15:47:00	300002221229	0	56	3	0			0	0	0	0	0	0
2021-01-15 16:19:00	300003015464	1	57	3	0			0	0	0	0	0	0
2021-01-15 16:35:00	001100227800	1	79	5	0			0	0	0	0	0	0
2021-01-18 08:02:00	500001341974	0	42	2	0			0	0	0	0	0	0
2021-01-18 08:06:00	300003154553	0	43	2	0			0	0	0	0	0	0
2021-01-18 08:09:00	500001342078	0	48	2	0			0	0	0	0	0	0
2021-01-18 08:11:00	001103047000	1	67	4	0			0	0	0	0	0	0
2021-01-18 08:18:00	500001339365	0	32	1	0			0	0	0	0	0	0
2021-01-18 08:25:00	001102337200	0	66	4	0			0	0	0	0	0	0
2021-01-18 08:31:00	300003033254	0	41	2	0			0	0	0	0	0	0
2021-01-18 08:33:00	200000014612	0	67	4	0			0	0	0	0	0	0
2021-01-18 08:36:00	500000920473	0	31	1	0			0	0	0	0	0	0
2021-01-18 08:37:00	500001343267	0	50	2	0			0	0	0	0	0	0
2021-01-18 08:39:00	000905975200	1	54	3	0			0	0	0	0	0	0
2021-01-18 08:41:00	500001333670	0	58	3	0			0	0	0	0	0	0
2021-01-18 08:42:00	001102298000	1	53	3	0			0	0	0	0	0	0
2021-01-18 08:48:00	300001041331	0	44	2	0			0	0	0	0	0	0
2021-01-18 08:48:00	500001330226	1	47	2	0			0	0	0	0	0	0
2021-01-18 09:12:00	300001922628	0	54	3	0			0	0	0	0	0	0
2021-01-18 09:19:00	500001344026	0	65	4	0			0	0	0	0	0	0
2021-01-18 09:19:00	300003376454	0	41	2	0			0	0	0	0	0	0
2021-01-18 09:22:00	001032012400	0	64	4	0			0	0	0	0	0	0
2021-01-18 09:25:00	000519081300	0	48	2	0			0	0	0	0	0	0
2021-01-18 09:31:00	500000416383	0	43	2	0			0	0	0	0	0	0
2021-01-18 09:38:00	001102680800	0	53	3	0			0	0	0	0	0	0
2021-01-18 09:38:00	300002630118	0	51	3	0			0	0	0	0	0	0
2021-01-18 09:41:00	500001345126	1	54	3	0			0	0	0	0	0	0
2021-01-18 09:54:00	300001675194	1	43	2	0			0	0	0	0	0	0
2021-01-18 09:57:00	500001340802	1	40	1	0			0	0	0	0	0	0
2021-01-18 10:09:00	500001345252	1	49	2	0			0	0	0	0	0	0
2021-01-18 10:10:00	300003437746	0	58	3	0			0	0	0	0	0	0
2021-01-18 10:26:00	001020336500	0	47	2	0			0	0	0	0	0	0
2021-01-18 10:30:00	000916456400	1	49	2	0			0	0	0	0	0	0
2021-01-18 10:30:00	500001104943	0	65	4	0			0	0	0	0	0	0
2021-01-18 10:43:00	300000963715	1	47	2	0			0	0	0	0	0	0
2021-01-18 10:47:00	500001342403	0	59	3	0			0	0	0	0	0	0
2021-01-18 10:56:00	500001344620	0	52	3	0			0	0	0	0	0	0
2021-01-18 11:11:00	500001340543	1	60	3	0			0	0	0	0	0	0
2021-01-18 11:22:00	300002856271	0	74	5	0			0	0	0	0	0	0
2021-01-18 11:26:00	500001344198	0	54	3	0			0	0	0	0	0	0
2021-01-18 14:04:00	300003212609	0	43	2	0			0	0	0	0	0	0
2021-01-18 14:05:00	300003089607	1	53	3	0			0	0	0	0	0	0
2021-01-18 14:06:00	500000668574	0	72	5	0			0	0	0	0	0	0
2021-01-18 14:09:00	001102843500	1	66	4	0			0	0	0	0	0	0
2021-01-18 14:09:00	500000635868	0	47	2	0			0	0	0	0	0	0
2021-01-18 14:12:00	300002922787	1	50	2	1	1		1	1	0	0	0	0
2021-01-18 14:19:00	500000935645	0	59	3	0			0	0	0	0	0	0
2021-01-18 14:22:00	000967153000	1	53	3	0			0	0	0	0	0	0
2021-01-18 14:24:00	500001039400	0	21	1	0			0	0	0	0	0	0
2021-01-18 14:28:00	300001805488	1	47	2	0			0	0	0	0	0	0
2021-01-18 14:30:00	500000940284	0	58	3	0			0	0	0	0	0	0
2021-01-18 14:34:00	500000446334	1	53	3	0			0	0	0	0	0	0
2021-01-18 14:36:00	300003544710	0	62	4	0			0	0	0	0	0	0
2021-01-18 14:43:00	300001883834	1	33	1	0			0	0	0	0	0	0
2021-01-18 14:44:00	500001345348	0	44	2	0			0	0	0	0	0	0
2021-01-18 14:44:00	300002506111	1	64	4	1		1	0	0	0	0	1	1
2021-01-18 14:46:00	500001347091	0	50	2	0			0	0	0	0	0	0
2021-01-18 14:47:00	001092420400	1	31	1	0			0	0	0	0	0	0
2021-01-18 14:48:00	500001346748	0	50	2	0			0	0	0	0	0	0
2021-01-18 14:51:00	300002350481	0	63	4	0			0	0	0	0	0	0
2021-01-18 14:53:00	300000903207	1	54	3	0			0	0	0	0	0	0
2021-01-18 14:55:00	500001340656	1	45	2	0			0	0	0	0	0	0
2021-01-18 14:56:00	500001344052	1	53	3	0			0	0	0	0	0	0
2021-01-18 14:58:00	300003553039	0	53	3	0			0	0	0	0	0	0
2021-01-18 15:05:00	300002741253	1	45	2	0			0	0	0	0	0	0
2021-01-18 15:05:00	500001344596	0	21	1	0			0	0	0	0	0	0
2021-01-18 15:05:00	500001340018	1	48	2	0			0	0	0	0	0	0
2021-01-18 15:13:00	500000048963	0	27	1	0			0	0	0	0	0	0
2021-01-18 15:13:00	500000514472	1	59	3	0			0	0	0	0	0	0
2021-01-18 15:15:00	500000805286	0	33	1	0			0	0	0	0	0	0
2021-01-18 15:17:00	500000399966	1	67	4	0			0	0	0	0	0	0
2021-01-18 15:25:00	500001344090	0	64	4	1	1		1	0	0	0	0	0
2021-01-18 15:27:00	300003386646	0	45	2	0			0	0	0	0	0	0
2021-01-18 15:28:00	500001344838	1	54	3	0			0	0	0	0	0	0
2021-01-18 15:31:00	300002362374	0	57	3	0			0	0	0	0	0	0
2021-01-18 15:34:00	12070669	0	27	1	0			0	0	0	0	0	0
2021-01-18 15:37:00	500000538307	1	46	2	0			0	0	0	0	0	0
2021-01-18 15:40:00	500000461371	1	49	2	0			0	0	0	0	0	0
2021-01-18 15:41:00	300000554647	0	47	2	0			0	0	0	0	0	0
2021-01-18 15:44:00	500001345068	1	37	1	0			0	0	0	0	0	0
2021-01-18 15:45:00	500001342243	1	46	2	0			0	0	0	0	0	0
2021-01-18 15:53:00	500000660579	0	40	1	0			0	0	0	0	0	0
2021-01-18 15:55:00	500000186146	1	29	1	0			0	0	0	0	0	0
2021-01-18 16:03:00	500000913467	0	31	1	0			0	0	0	0	0	0
2021-01-18 16:12:00	300000551758	0	43	2	0			0	0	0	0	0	0
2021-01-18 16:19:00	300003541521	0	30	1	0			0	0	0	0	0	0
2021-01-19 07:59:00	001008969800	0	55	3	0			0	0	0	0	0	0
2021-01-19 08:01:00	300000222880	1	46	2	0			0	0	0	0	0	0
2021-01-19 08:01:00	500001337223	1	29	1	0			0	0	0	0	0	0
2021-01-19 08:16:00	300003457926	1	64	4	0			0	0	0	0	0	0
2021-01-19 08:24:00	001096951100	1	36	1	0			0	0	0	0	0	0
2021-01-19 08:29:00	300003034816	0	46	2	0			0	0	0	0	0	0
2021-01-19 08:31:00	000680734900	1	49	2	0			0	0	0	0	0	0
2021-01-19 08:42:00	001007441100	1	41	2	0			0	0	0	0	0	0
2021-01-19 08:42:00	500000814450	1	40	1	0			0	0	0	0	0	0
2021-01-19 08:42:00	001097105500	0	52	3	0			0	0	0	0	0	0
2021-01-19 08:58:00	000690024900	0	61	4	0			0	0	0	0	0	0
2021-01-19 09:16:00	199503	1	18	1	0			0	0	0	0	0	0
2021-01-19 09:16:00	500001273972	1	78	5	0			0	0	0	0	0	0
2021-01-19 09:17:00	001103583000	0	64	4	0			0	0	0	0	0	0
2021-01-19 09:29:00	300001849511	1	53	3	0			0	0	0	0	0	0
2021-01-19 09:29:00	300001065992	0	46	2	0			0	0	0	0	0	0
2021-01-19 09:34:00	300001452992	1	69	4	0			0	0	0	0	0	0
2021-01-19 09:37:00	500001348349	0	34	1	0			0	0	0	0	0	0
2021-01-19 09:40:00	001103279700	0	55	3	1	1		0	1	0	0	0	0
2021-01-19 09:43:00	000838300700	1	28	1	0			0	0	0	0	0	0
2021-01-19 09:52:00	500000398098	0	66	4	0			0	0	0	0	0	0
2021-01-19 10:08:00	300003387890	1	32	1	0			0	0	0	0	0	0
2021-01-19 10:10:00	300002484531	0	39	1	0			0	0	0	0	0	0
2021-01-19 10:15:00	300002852065	1	54	3	0			0	0	0	0	0	0
2021-01-19 10:23:00	001080936500	1	54	3	0			0	0	0	0	0	0
2021-01-19 10:28:00	500001347441	0	68	4	0			0	0	0	0	0	0
2021-01-19 10:33:00	001104039800	0	33	1	0			0	0	0	0	0	0
2021-01-19 10:37:00	300003193512	1	31	1	0			0	0	0	0	0	0
2021-01-19 10:39:00	500001007422	0	24	1	0			0	0	0	0	0	0
2021-01-19 10:44:00	000959463800	1	54	3	0			0	0	0	0	0	0
2021-01-19 11:01:00	300000065130	1	54	3	0			0	0	0	0	0	0
2021-01-19 11:08:00	000924425000	1	71	5	1	1		0	1	0	0	0	0
2021-01-19 11:25:00	500000257037	1	28	1	0			0	0	0	0	0	0
2021-01-19 11:26:00	500001348275	0	67	4	0			0	0	0	0	0	0
2021-01-19 11:29:00	000697371500	0	58	3	0			0	0	0	0	0	0
2021-01-20 07:59:00	000789972800	1	53	3	0			0	0	0	0	0	0
2021-01-20 07:59:00	001054670800	0	39	1	0			0	0	0	0	0	0
2021-01-20 08:05:00	001091918700	0	37	1	0			0	0	0	0	0	0
2021-01-20 08:11:00	500001350473	1	57	3	1	1		0	1	0	0	0	0
2021-01-20 08:13:00	11401445	1	66	4	0			0	0	0	0	0	0
2021-01-20 08:23:00	500001350867	0	54	3	0			0	0	0	0	0	0
2021-01-20 08:27:00	001035650400	0	49	2	0			0	0	0	0	0	0
2021-01-20 08:41:00	300002357430	0	32	1	0			0	0	0	0	0	0
2021-01-20 08:49:00	500001349454	1	48	2	0			0	0	0	0	0	0
2021-01-20 08:51:00	300002979735	1	66	4	0			0	0	0	0	0	0
2021-01-20 08:52:00	300000125508	1	43	2	0			0	0	0	0	0	0
2021-01-20 08:59:00	001104021500	0	46	2	0			0	0	0	0	0	0
2021-01-20 09:05:00	300001700194	0	78	5	0			0	0	0	0	0	0
2021-01-20 09:08:00	001103921900	1	49	2	0			0	0	0	0	0	0
2021-01-20 09:08:00	500000615366	0	69	4	0			0	0	0	0	0	0
2021-01-20 09:18:00	001104165100	0	50	2	0			0	0	0	0	0	0
2021-01-20 09:28:00	500001350126	0	58	3	1	1		0	0	1	0	0	0
2021-01-20 09:31:00	300000648534	1	41	2	0			0	0	0	0	0	0
2021-01-20 09:37:00	300002344443	1	55	3	0			0	0	0	0	0	0
2021-01-20 09:40:00	300003153720	1	35	1	0			0	0	0	0	0	0
2021-01-20 09:45:00	300002598725	0	30	1	0			0	0	0	0	0	0
2021-01-20 09:50:00	000100337300	1	31	1	0			0	0	0	0	0	0
2021-01-20 09:52:00	500001330118	1	46	2	0			0	0	0	0	0	0
2021-01-20 10:00:00	500001350065	0	30	1	0			0	0	0	0	0	0
2021-01-20 10:02:00	500001351293	0	47	2	0			0	0	0	0	0	0
2021-01-20 10:02:00	12751033	0	50	2	1	1		1	0	0	0	0	0
2021-01-20 10:05:00	300002891852	1	60	3	0			0	0	0	0	0	0
2021-01-20 10:19:00	500001142948	0	50	2	0			0	0	0	0	0	0
2021-01-20 10:22:00	300003453270	1	57	3	0			0	0	0	0	0	0
2021-01-20 10:25:00	500000300900	0	61	4	0			0	0	0	0	0	0
2021-01-20 10:34:00	001103059500	1	52	3	0			0	0	0	0	0	0
2021-01-20 10:41:00	000766489800	1	40	1	0			0	0	0	0	0	0
2021-01-20 11:00:00	001092224400	1	46	2	0			0	0	0	0	0	0
2021-01-20 11:04:00	500001280321	0	54	3	0			0	0	0	0	0	0
2021-01-20 14:00:00	300002960515	0	18	1	0			0	0	0	0	0	0
2021-01-20 14:02:00	300001869688	1	48	2	0			0	0	0	0	0	0
2021-01-20 14:02:00	500001346557	1	43	2	0			0	0	0	0	0	0
2021-01-20 14:03:00	500001348256	1	42	2	0			0	0	0	0	0	0
2021-01-20 14:11:00	300003233019	0	56	3	0			0	0	0	0	0	0
2021-01-20 14:16:00	300001340900	0	55	3	0			0	0	0	0	0	0
2021-01-20 14:18:00	300000834071	1	62	4	0			0	0	0	0	0	0
2021-01-20 14:19:00	500000819726	0	58	3	0			0	0	0	0	0	0
2021-01-20 14:20:00	500001272576	1	45	2	0			0	0	0	0	0	0
2021-01-20 14:31:00	500001317552	1	71	5	0			0	0	0	0	0	0
2021-01-20 14:31:00	500001348035	1	53	3	0			0	0	0	0	0	0
2021-01-20 14:31:00	500001346632	1	53	3	0			0	0	0	0	0	0
2021-01-20 14:34:00	300001490114	0	52	3	0			0	0	0	0	0	0
2021-01-20 14:44:00	300002624955	1	63	4	0			0	0	0	0	0	0
2021-01-20 14:46:00	500000068927	0	38	1	0			0	0	0	0	0	0
2021-01-20 14:51:00	500001343852	1	54	3	0			0	0	0	0	0	0
2021-01-20 14:55:00	500000848800	0	20	1	0			0	0	0	0	0	0
2021-01-20 14:55:00	300003092636	1	52	3	1		1	0	0	0	0	1	0
2021-01-20 14:56:00	500001348657	0	56	3	0			0	0	0	0	0	0
2021-01-20 15:00:00	500001341383	0	29	1	1	1		1	1	0	0	0	0
2021-01-20 15:01:00	300002783172	1	42	2	0			0	0	0	0	0	0
2021-01-20 15:07:00	300002835371	1	49	2	1	1		1	0	0	0	0	0
2021-01-20 15:09:00	500001347525	0	80	5	0			0	0	0	0	0	0
2021-01-20 15:12:00	11163385	0	68	4	0			0	0	0	0	0	0
2021-01-20 15:16:00	300003363332	1	51	3	0			0	0	0	0	0	0
2021-01-20 15:20:00	500001344383	1	53	3	0			0	0	0	0	0	0
2021-01-20 15:20:00	500000208855	1	33	1	0			0	0	0	0	0	0
2021-01-20 15:21:00	300000722944	1	45	2	0			0	0	0	0	0	0
2021-01-20 15:22:00	500001239658	1	23	1	0			0	0	0	0	0	0
2021-01-20 15:24:00	500000202877	1	67	4	0			0	0	0	0	0	0
2021-01-20 15:26:00	500001348013	0	55	3	0			0	0	0	0	0	0
2021-01-20 15:40:00	500001348290	0	47	2	0			0	0	0	0	0	0
2021-01-20 15:41:00	300000331546	1	70	4	0			0	0	0	0	0	0
2021-01-20 15:42:00	300000873874	1	54	3	0			0	0	0	0	0	0
2021-01-20 15:43:00	500000997793	0	22	1	0			0	0	0	0	0	0
2021-01-20 15:45:00	500001349093	0	50	2	0			0	0	0	0	0	0
2021-01-20 15:53:00	500001265320	0	45	2	0			0	0	0	0	0	0
2021-01-20 15:56:00	500001348830	0	67	4	0			0	0	0	0	0	0
2021-01-20 15:57:00	500001349179	0	50	2	0			0	0	0	0	0	0
2021-01-20 15:58:00	300002488260	0	63	4	0			0	0	0	0	0	0
2021-01-20 15:59:00	300000532039	1	48	2	0			0	0	0	0	0	0
2021-01-20 16:03:00	500001347251	1	68	4	0			0	0	0	0	0	0
2021-01-20 16:07:00	500001307010	1	29	1	0			0	0	0	0	0	0
2021-01-20 16:10:00	300000835520	1	37	1	0			0	0	0	0	0	0
2021-01-20 16:11:00	500001255152	0	42	2	0			0	0	0	0	0	0
2021-01-20 16:17:00	200000010552	0	39	1	0			0	0	0	0	0	0
2021-01-20 16:17:00	300003358797	0	49	2	0			0	0	0	0	0	0
2021-01-20 16:20:00	500000892176	0	55	3	0			0	0	0	0	0	0
2021-01-20 16:22:00	500000167014	1	54	3	0			0	0	0	0	0	0
2021-01-20 16:25:00	500001349074	0	20	1	0			0	0	0	0	0	0
2021-01-20 16:29:00	500000126193	1	29	1	0			0	0	0	0	0	0
2021-01-20 16:32:00	300003468718	1	47	2	0			0	0	0	0	0	0
2021-01-20 16:34:00	500001347617	1	53	3	0			0	0	0	0	0	0
2021-01-20 16:35:00	500001347807	0	52	3	0			0	0	0	0	0	0
2021-01-20 16:38:00	500001345074	1	47	2	0			0	0	0	0	0	0
2021-01-20 16:42:00	300002096717	0	45	2	0			0	0	0	0	0	0
2021-01-20 16:53:00	48918	0	42	2	1	1		1	0	0	0	0	0
2021-01-20 16:58:00	500001349159	0	63	4	0			0	0	0	0	0	0
2021-01-20 17:00:00	000925339700	1	55	3	0			0	0	0	0	0	0
2021-01-21 07:58:00	001104229100	0	50	2	1	1		0	1	0	0	0	0	fecal impaction
2021-01-21 08:00:00	001103226200	0	21	1	0			0	0	0	0	0	0
2021-01-21 08:01:00	000620639100	0	57	3	0			0	0	0	0	0	0
2021-01-21 08:14:00	300002323042	1	50	2	0			0	0	0	0	0	0
2021-01-21 08:16:00	001092459700	0	40	1	0			0	0	0	0	0	0
2021-01-21 08:35:00	001092252800	0	30	1	0			0	0	0	0	0	0
2021-01-21 08:40:00	500000169377	0	28	1	0			0	0	0	0	0	0
2021-01-21 08:41:00	000805008900	1	24	1	0			0	0	0	0	0	0
2021-01-21 08:52:00	200000006711	1	47	2	0			0	0	0	0	0	0
2021-01-21 08:57:00	500001352627	1	65	4	0			0	0	0	0	0	0
2021-01-21 08:57:00	300000330174	0	47	2	0			0	0	0	0	0	0
2021-01-21 09:00:00	000877758200	0	19	1	0			0	0	0	0	0	0
2021-01-21 09:04:00	001103970000	0	69	4	0			0	0	0	0	0	0
2021-01-21 09:09:00	001075777900	1	76	5	0			0	0	0	0	0	0
2021-01-21 09:13:00	001103682500	1	71	5	0			0	0	0	0	0	0
2021-01-21 09:27:00	500001351992	0	42	2	0			0	0	0	0	0	0
2021-01-21 09:30:00	300001959016	0	41	2	0			0	0	0	0	0	0
2021-01-21 09:33:00	001103528500	0	47	2	0			0	0	0	0	0	0
2021-01-21 09:36:00	300002319139	0	44	2	0			0	0	0	0	0	0
2021-01-21 09:46:00	300002109665	0	40	1	0			0	0	0	0	0	0
2021-01-21 09:52:00	300000410930	0	64	4	0			0	0	0	0	0	0
2021-01-21 10:19:00	500001345180	0	36	1	0			0	0	0	0	0	0
2021-01-21 10:46:00	300002536189	1	30	1	0			0	0	0	0	0	0
2021-01-21 10:58:00	500001352754	0	18	1	0			0	0	0	0	0	0
2021-01-21 14:06:00	500000853307	1	57	3	0			0	0	0	0	0	0
2021-01-21 14:07:00	500001350313	1	37	1	0			0	0	0	0	0	0
2021-01-21 14:11:00	500001344635	1	46	2	0			0	0	0	0	0	0
2021-01-21 14:14:00	500001350273	0	64	4	0			0	0	0	0	0	0
2021-01-21 14:17:00	500001350476	1	57	3	0			0	0	0	0	0	0
2021-01-21 14:20:00	300000314638	1	43	2	0			0	0	0	0	0	0
2021-01-21 14:28:00	500001350378	1	38	1	0			0	0	0	0	0	0
2021-01-21 14:29:00	300003570257	0	31	1	0			0	0	0	0	0	0
2021-01-21 14:34:00	500001347591	1	52	3	0			0	0	0	0	0	0
2021-01-21 14:39:00	500000417982	0	44	2	0			0	0	0	0	0	0
2021-01-21 14:40:00	300000041127	1	66	4	0			0	0	0	0	0	0
2021-01-21 14:40:00	80117902	1	59	3	1		1	0	0	0	0	1	0
2021-01-21 14:41:00	300002155830	0	30	1	0			0	0	0	0	0	0
2021-01-21 14:42:00	300001511160	1	51	3	0			0	0	0	0	0	0
2021-01-21 14:51:00	300002680493	1	37	1	0			0	0	0	0	0	0
2021-01-21 14:54:00	300003473028	1	60	3	0			0	0	0	0	0	0
2021-01-21 14:55:00	500001351072	1	51	3	0			0	0	0	0	0	0
2021-01-21 15:00:00	500001340516	1	50	2	0			0	0	0	0	0	0
2021-01-21 15:03:00	500001350664	1	52	3	0			0	0	0	0	0	0
2021-01-21 15:10:00	300003160381	0	69	4	0			0	0	0	0	0	0
2021-01-21 15:12:00	300001709855	0	50	2	0			0	0	0	0	0	0
2021-01-21 15:15:00	300000127147	1	67	4	0			0	0	0	0	0	0
2021-01-21 15:20:00	500001344326	1	32	1	1	1		0	1	0	0	0	0
2021-01-21 15:26:00	300000143634	1	57	3	1	1		0	1	0	0	0	0
2021-01-21 15:29:00	500001351069	1	33	1	0			0	0	0	0	0	0
2021-01-21 15:34:00	300003498462	0	37	1	0			0	0	0	0	0	0
2021-01-21 15:40:00	300002282967	0	34	1	0			0	0	0	0	0	0
2021-01-21 15:41:00	300001886390	1	67	4	0			0	0	0	0	0	0
2021-01-21 15:42:00	500001351479	1	55	3	0			0	0	0	0	0	0
2021-01-21 15:43:00	300002932670	1	44	2	0			0	0	0	0	0	0
2021-01-21 15:44:00	300000957337	1	54	3	0			0	0	0	0	0	0
2021-01-21 15:49:00	500000250969	0	22	1	0			0	0	0	0	0	0
2021-01-21 15:52:00	300000195603	1	56	3	0			0	0	0	0	0	0
2021-01-21 15:57:00	300001475345	0	47	2	0			0	0	0	0	0	0
2021-01-21 16:00:00	500001351933	0	71	5	0			0	0	0	0	0	0
2021-01-21 16:01:00	500000057987	0	52	3	0			0	0	0	0	0	0
2021-01-21 16:05:00	300002095152	1	73	5	0			0	0	0	0	0	0
2021-01-21 16:09:00	500000608546	1	50	2	0			0	0	0	0	0	0
2021-01-21 16:12:00	500001351952	1	61	4	0			0	0	0	0	0	0
2021-01-21 16:12:00	300003520315	1	57	3	0			0	0	0	0	0	0
2021-01-21 16:13:00	300002412598	1	42	2	0			0	0	0	0	0	0
2021-01-21 16:20:00	500001045050	1	48	2	0			0	0	0	0	0	0
2021-01-21 16:26:00	300003278083	0	58	3	0			0	0	0	0	0	0
2021-01-21 16:27:00	500000240451	0	45	2	0			0	0	0	0	0	0
2021-01-21 16:29:00	300001932534	1	46	2	0			0	0	0	0	0	0
2021-01-21 16:32:00	300001143724	1	50	2	0			0	0	0	0	0	0
2021-01-21 16:38:00	300002440302	1	48	2	0			0	0	0	0	0	0
2021-01-21 16:44:00	500001352542	0	56	3	0			0	0	0	0	0	0
2021-01-21 16:44:00	500001351759	1	54	3	0			0	0	0	0	0	0
2021-01-21 16:48:00	500001309325	1	51	3	0			0	0	0	0	0	0
2021-01-21 16:50:00	500001351646	1	57	3	0			0	0	0	0	0	0
2021-01-21 16:56:00	300003540036	1	32	1	0			0	0	0	0	0	0
2021-01-21 17:02:00	300003516554	0	67	4	1		1	0	0	0	1	0	0
2021-01-21 17:05:00	12856361	1	46	2	0			0	0	0	0	0	0
2021-01-21 17:08:00	300003471250	1	42	2	0			0	0	0	0	0	0
2021-01-21 17:08:00	300000582381	0	31	1	0			0	0	0	0	0	0
2021-01-21 17:13:00	300001934606	1	48	2	0			0	0	0	0	0	0
2021-01-21 17:14:00	500000845527	0	34	1	0			0	0	0	0	0	0
2021-01-21 17:22:00	500000659410	0	42	2	1	1		0	0	1	0	0	0
2021-01-22 07:49:00	000236724800	1	44	2	0			0	0	0	0	0	0
2021-01-22 07:57:00	300003449180	1	47	2	0			0	0	0	0	0	0
2021-01-22 07:58:00	500001354235	1	48	2	0			0	0	0	0	0	0
2021-01-22 08:00:00	500001353801	1	51	3	0			0	0	0	0	0	0
2021-01-22 08:15:00	500001349874	0	52	3	0			0	0	0	0	0	0
2021-01-22 08:17:00	500001354124	1	48	2	0			0	0	0	0	0	0
2021-01-22 08:20:00	500000282531	0	54	3	0			0	0	0	0	0	0
2021-01-22 08:21:00	300001091263	1	42	2	0			0	0	0	0	0	0
2021-01-22 08:26:00	500000811070	1	20	1	0			0	0	0	0	0	0
2021-01-22 08:26:00	500001210135	0	51	3	0			0	0	0	0	0	0
2021-01-22 08:39:00	500001354857	0	19	1	0			0	0	0	0	0	0
2021-01-22 08:45:00	001103316400	0	22	1	0			0	0	0	0	0	0
2021-01-22 08:46:00	001053468100	1	31	1	0			0	0	0	0	0	0
2021-01-22 09:00:00	80050969	0	57	3	0			0	0	0	0	0	0
2021-01-22 09:13:00	500000135652	1	41	2	0			0	0	0	0	0	0
2021-01-22 09:16:00	001104859200	1	36	1	0			0	0	0	0	0	0
2021-01-22 09:22:00	001092252900	0	27	1	0			0	0	0	0	0	0
2021-01-22 09:33:00	500001354310	0	37	1	0			0	0	0	0	0	0
2021-01-22 09:34:00	001104708000	0	42	2	0			0	0	0	0	0	0
2021-01-22 09:36:00	300002529248	0	63	4	0			0	0	0	0	0	0
2021-01-22 09:42:00	500001353787	1	58	3	0			0	0	0	0	0	0
2021-01-22 09:42:00	001103493700	1	70	4	0			0	0	0	0	0	0
2021-01-22 09:52:00	001092252700	0	26	1	0			0	0	0	0	0	0
2021-01-22 09:53:00	500001354353	1	41	2	0			0	0	0	0	0	0
2021-01-22 09:57:00	500001010359	0	62	4	0			0	0	0	0	0	0
2021-01-22 09:58:00	500001354329	1	41	2	0			0	0	0	0	0	0
2021-01-22 10:06:00	300001526228	1	46	2	0			0	0	0	0	0	0
2021-01-22 10:10:00	300003377100	1	64	4	0			0	0	0	0	0	0
2021-01-22 10:32:00	500001354176	1	56	3	0			0	0	0	0	0	0
2021-01-22 10:52:00	000682543000	1	53	3	0			0	0	0	0	0	0
2021-01-22 11:02:00	001092253000	0	29	1	0			0	0	0	0	0	0
2021-01-22 11:05:00	300003002986	1	40	1	0			0	0	0	0	0	0
2021-01-22 11:09:00	001104230300	0	72	5	0			0	0	0	0	0	0
2021-01-22 11:17:00	001080933800	0	51	3	0			0	0	0	0	0	0
2021-01-22 11:22:00	001104666900	1	69	4	0			0	0	0	0	0	0
2021-01-22 11:33:00	001080933900	0	54	3	0			0	0	0	0	0	0
2021-01-22 11:51:00	001104788100	0	46	2	0			0	0	0	0	0	0
2021-01-22 14:00:00	300000145363	0	56	3	1	1		1	0	0	0	0	0
2021-01-22 14:05:00	500001353462	0	54	3	0			0	0	0	0	0	0
2021-01-22 14:07:00	300002882223	0	72	5	0			0	0	0	0	0	0
2021-01-22 14:08:00	300000873471	1	33	1	0			0	0	0	0	0	0
2021-01-22 14:12:00	500001352025	1	42	2	0			0	0	0	0	0	0
2021-01-22 14:20:00	001104781100	0	55	3	0			0	0	0	0	0	0
2021-01-22 14:21:00	500001351716	1	70	4	0			0	0	0	0	0	0
2021-01-22 14:24:00	300003488513	0	64	4	0			0	0	0	0	0	0
2021-01-22 14:29:00	500001353733	0	46	2	1	1	1	1	0	0	0	1	0
2021-01-22 14:32:00	300003593096	1	71	5	0			0	0	0	0	0	0
2021-01-22 14:40:00	300000188693	0	51	3	0			0	0	0	0	0	0
2021-01-22 14:43:00	300001079193	0	37	1	0			0	0	0	0	0	0
2021-01-22 14:47:00	300002673534	1	46	2	0			0	0	0	0	0	0
2021-01-22 14:51:00	500001350603	0	28	1	0			0	0	0	0	0	0
2021-01-22 14:53:00	500001353863	0	61	4	0			0	0	0	0	0	0
2021-01-22 14:53:00	500001353872	0	57	3	0			0	0	0	0	0	0
2021-01-22 14:57:00	300002717468	1	54	3	0			0	0	0	0	0	0
2021-01-22 14:57:00	11167654	0	69	4	0			0	0	0	0	0	0
2021-01-22 14:57:00	300003614490	0	48	2	0			0	0	0	0	0	0
2021-01-22 15:03:00	13934418	1	67	4	0			0	0	0	0	0	0
2021-01-22 15:05:00	500001155033	0	28	1	0			0	0	0	0	0	0
2021-01-22 15:13:00	500001353812	0	25	1	0			0	0	0	0	0	0
2021-01-22 15:14:00	500001353766	0	66	4	0			0	0	0	0	0	0
2021-01-22 15:16:00	700536596200	0	51	3	0			0	0	0	0	0	0
2021-01-22 15:16:00	300002706041	1	45	2	0			0	0	0	0	0	0
2021-01-22 15:18:00	300002795150	1	56	3	0			0	0	0	0	0	0
2021-01-22 15:20:00	001058994900	1	58	3	0			0	0	0	0	0	0
2021-01-22 15:26:00	300002761917	1	63	4	0			0	0	0	0	0	0
2021-01-22 15:27:00	300002164188	1	35	1	0			0	0	0	0	0	0
2021-01-22 15:27:00	500001354213	0	37	1	0			0	0	0	0	0	0
2021-01-22 15:31:00	500001351823	1	55	3	0			0	0	0	0	0	0
2021-01-22 15:34:00	500001342952	0	39	1	0			0	0	0	0	0	0
2021-01-22 15:35:00	500001353970	0	31	1	0			0	0	0	0	0	0
2021-01-22 15:35:00	500000345969	0	28	1	0			0	0	0	0	0	0
2021-01-22 15:41:00	500001351650	1	34	1	0			0	0	0	0	0	0
2021-01-22 15:41:00	300002795690	1	36	1	0			0	0	0	0	0	0
2021-01-22 15:45:00	300001812895	0	45	2	0			0	0	0	0	0	0
2021-01-22 15:47:00	500000307852	1	27	1	0			0	0	0	0	0	0
2021-01-22 15:49:00	500000573200	1	22	1	0			0	0	0	0	0	0
2021-01-22 15:57:00	300003282509	1	42	2	0			0	0	0	0	0	0
2021-01-22 15:57:00	700518431400	1	58	3	0			0	0	0	0	0	0
2021-01-22 16:00:00	000715259000	1	44	2	0			0	0	0	0	0	0
2021-01-22 16:07:00	300003285848	1	48	2	0			0	0	0	0	0	0
2021-01-25 07:55:00	500000248374	0	73	5	0			0	0	0	0	0	0
2021-01-25 07:59:00	000677381100	0	55	3	0			0	0	0	0	0	0
2021-01-25 08:00:00	12168827	0	60	3	0			0	0	0	0	0	0
2021-01-25 08:07:00	500000283472	0	46	2	0			0	0	0	0	0	0
2021-01-25 08:10:00	300003586648	0	66	4	0			0	0	0	0	0	0
2021-01-25 08:27:00	300003089136	0	47	2	0			0	0	0	0	0	0
2021-01-25 08:28:00	000786743700	1	65	4	0			0	0	0	0	0	0
2021-01-25 08:28:00	300002429385	0	57	3	0			0	0	0	0	0	0
2021-01-25 08:30:00	500001359141	0	42	2	0			0	0	0	0	0	0
2021-01-25 08:39:00	500000162416	0	57	3	0			0	0	0	0	0	0
2021-01-25 08:44:00	300002998424	1	39	1	0			0	0	0	0	0	0
2021-01-25 08:54:00	300001469122	0	52	3	0			0	0	0	0	0	0
2021-01-25 09:03:00	001097969100	0	62	4	1		1	0	0	0	0	1	0
2021-01-25 09:04:00	300002112105	1	63	4	0			0	0	0	0	0	0
2021-01-25 09:10:00	000844854800	1	75	5	0			0	0	0	0	0	0
2021-01-25 09:16:00	500001266915	0	52	3	0			0	0	0	0	0	0
2021-01-25 09:27:00	001105124400	0	51	3	0			0	0	0	0	0	0
2021-01-25 09:30:00	001105173900	1	25	1	0			0	0	0	0	0	0
2021-01-25 09:42:00	001078081300	0	66	4	0			0	0	0	0	0	0
2021-01-25 09:55:00	500001247824	1	47	2	0			0	0	0	0	0	0
2021-01-25 10:00:00	001090703000	0	36	1	0			0	0	0	0	0	0
2021-01-25 10:03:00	500000107129	0	74	5	0			0	0	0	0	0	0
2021-01-25 10:22:00	001103469600	1	34	1	0			0	0	0	0	0	0
2021-01-25 10:23:00	001081462200	1	35	1	0			0	0	0	0	0	0
2021-01-25 10:39:00	500000631500	1	42	2	0			0	0	0	0	0	0
2021-01-25 10:40:00	500001342886	1	22	1	0			0	0	0	0	0	0
2021-01-25 10:54:00	001104929800	0	58	3	0			0	0	0	0	0	0
2021-01-25 10:57:00	500000503076	1	34	1	0			0	0	0	0	0	0
2021-01-25 10:59:00	500001326505	1	63	4	0			0	0	0	0	0	0
2021-01-25 11:53:00	300002936475	0	75	5	0			0	0	0	0	0	0
2021-01-25 14:01:00	500001342456	1	24	1	0			0	0	0	0	0	0
2021-01-25 14:03:00	500000064722	1	40	1	0			0	0	0	0	0	0
2021-01-25 14:05:00	300001745349	0	35	1	0			0	0	0	0	0	0
2021-01-25 14:05:00	500001354066	1	45	2	0			0	0	0	0	0	0
2021-01-25 14:11:00	001037038800	1	55	3	0			0	0	0	0	0	0
2021-01-25 14:12:00	001016044600	0	63	4	0			0	0	0	0	0	0
2021-01-25 14:26:00	500000914468	1	40	1	0			0	0	0	0	0	0
2021-01-25 14:27:00	500000694769	0	48	2	0			0	0	0	0	0	0
2021-01-25 14:35:00	001105078800	1	58	3	0			0	0	0	0	0	0
2021-01-25 14:36:00	300003498638	0	34	1	0			0	0	0	0	0	0
2021-01-25 14:37:00	500001351962	1	39	1	0			0	0	0	0	0	0
2021-01-25 14:40:00	300003596436	0	50	2	0			0	0	0	0	0	0
2021-01-25 14:47:00	500001110766	1	59	3	0			0	0	0	0	0	0
2021-01-25 14:55:00	300000982832	1	61	4	0			0	0	0	0	0	0
2021-01-25 14:55:00	300002865143	0	63	4	0			0	0	0	0	0	0
2021-01-25 14:57:00	300001071061	1	66	4	0			0	0	0	0	0	0
2021-01-25 14:58:00	500001351030	0	32	1	0			0	0	0	0	0	0
2021-01-25 15:03:00	500001356095	1	45	2	0			0	0	0	0	0	0
2021-01-25 15:04:00	500000682607	0	47	2	0			0	0	0	0	0	0
2021-01-25 15:05:00	300002145412	0	49	2	0			0	0	0	0	0	0
2021-01-25 15:15:00	500001102410	1	63	4	0			0	0	0	0	0	0
2021-01-25 15:16:00	500001193984	0	40	1	0			0	0	0	0	0	0
2021-01-25 15:21:00	500000997578	0	21	1	0			0	0	0	0	0	0
2021-01-25 15:22:00	10712923	1	68	4	0			0	0	0	0	0	0
2021-01-25 15:29:00	300001323316	1	40	1	0			0	0	0	0	0	0
2021-01-25 15:30:00	300003124798	1	19	1	0			0	0	0	0	0	0
2021-01-25 15:30:00	300002587919	1	27	1	0			0	0	0	0	0	0
2021-01-25 15:33:00	300002951837	0	46	2	0			0	0	0	0	0	0
2021-01-25 15:33:00	300002983727	1	50	2	0			0	0	0	0	0	0
2021-01-25 15:35:00	500000171435	0	21	1	0			0	0	0	0	0	0
2021-01-25 15:35:00	500001300172	0	29	1	0			0	0	0	0	0	0
2021-01-25 15:37:00	300000556758	0	32	1	0			0	0	0	0	0	0
2021-01-25 15:40:00	500000370442	1	55	3	0			0	0	0	0	0	0
2021-01-25 15:42:00	500000879627	0	42	2	0			0	0	0	0	0	0
2021-01-25 15:45:00	300000805468	1	64	4	0			0	0	0	0	0	0
2021-01-25 15:51:00	300002731719	1	39	1	0			0	0	0	0	0	0
2021-01-25 15:56:00	300000333113	0	31	1	0			0	0	0	0	0	0
2021-01-25 15:57:00	500000724652	0	34	1	0			0	0	0	0	0	0
2021-01-25 16:05:00	500000157097	0	38	1	0			0	0	0	0	0	0
2021-01-25 16:06:00	500001358001	0	29	1	0			0	0	0	0	0	0
2021-01-25 16:08:00	500000230278	0	42	2	0			0	0	0	0	0	0
2021-01-25 16:09:00	300001595040	0	44	2	0			0	0	0	0	0	0
2021-01-25 16:12:00	500000889270	0	41	2	0			0	0	0	0	0	0
2021-01-25 16:15:00	500001359278	1	32	1	0			0	0	0	0	0	0
2021-01-25 16:22:00	300001663451	1	57	3	0			0	0	0	0	0	0
2021-01-25 16:23:00	500001356801	1	58	3	0			0	0	0	0	0	0
2021-01-25 16:34:00	500001276883	0	38	1	0			0	0	0	0	0	0
2021-01-26 07:55:00	500001347771	0	30	1	0			0	0	0	0	0	0
2021-01-26 07:58:00	300002821838	1	55	3	0			0	0	0	0	0	0
2021-01-26 08:03:00	000426069800	0	79	5	0			0	0	0	0	0	0
2021-01-26 08:20:00	001105790900	0	48	2	0			0	0	0	0	0	0
2021-01-26 08:20:00	001063193400	1	59	3	0			0	0	0	0	0	0
2021-01-26 08:21:00	001104469800	1	46	2	0			0	0	0	0	0	0
2021-01-26 08:27:00	500001348004	0	43	2	0			0	0	0	0	0	0
2021-01-26 08:28:00	001104798800	1	51	3	0			0	0	0	0	0	0
2021-01-26 08:35:00	300002650448	0	59	3	0			0	0	0	0	0	0
2021-01-26 08:36:00	500001359313	1	54	3	0			0	0	0	0	0	0
2021-01-26 08:38:00	300001121893	1	38	1	0			0	0	0	0	0	0
2021-01-26 08:45:00	300000400289	0	59	3	0			0	0	0	0	0	0
2021-01-26 08:47:00	001104803800	1	50	2	0			0	0	0	0	0	0
2021-01-26 09:04:00	500001251329	1	48	2	0			0	0	0	0	0	0
2021-01-26 09:04:00	001106019700	0	21	1	0			0	0	0	0	0	0
2021-01-26 09:09:00	500001361176	1	58	3	0			0	0	0	0	0	0
2021-01-26 09:17:00	001104931800	1	62	4	0			0	0	0	0	0	0
2021-01-26 09:22:00	606760	0	53	3	0			0	0	0	0	0	0
2021-01-26 09:23:00	500000084855	1	26	1	0			0	0	0	0	0	0
2021-01-26 09:39:00	300003467168	1	40	1	0			0	0	0	0	0	0
2021-01-26 09:40:00	500001360689	1	50	2	0			0	0	0	0	0	0
2021-01-26 09:45:00	500000705239	1	47	2	0			0	0	0	0	0	0
2021-01-26 09:51:00	300003331100	0	26	1	0			0	0	0	0	0	0
2021-01-26 10:00:00	300000039445	1	50	2	0			0	0	0	0	0	0
2021-01-26 10:10:00	001105741300	1	28	1	0			0	0	0	0	0	0
2021-01-26 10:18:00	500001354027	1	60	3	0			0	0	0	0	0	0
2021-01-26 10:24:00	001097484700	1	80	5	0			0	0	0	0	0	0
2021-01-26 10:33:00	300002147399	1	47	2	0			0	0	0	0	0	0
2021-01-26 10:41:00	300003093336	1	49	2	0			0	0	0	0	0	0
2021-01-26 10:48:00	500000116948	1	38	1	0			0	0	0	0	0	0
2021-01-26 10:54:00	300002373603	0	46	2	0			0	0	0	0	0	0
2021-01-26 11:03:00	700536518700	0	36	1	0			0	0	0	0	0	0
2021-01-26 11:05:00	300001742155	0	34	1	0			0	0	0	0	0	0
2021-01-26 11:39:00	000634094900	0	52	3	0			0	0	0	0	0	0
2021-01-27 08:00:00	00551	1	48	2	0			0	0	0	0	0	0
2021-01-27 08:04:00	500001351301	1	44	2	0			0	0	0	0	0	0
2021-01-27 08:23:00	000918410500	1	53	3	0			0	0	0	0	0	0
2021-01-27 08:24:00	000973657600	1	47	2	0			0	0	0	0	0	0
2021-01-27 08:27:00	001106001100	0	47	2	0			0	0	0	0	0	0
2021-01-27 08:28:00	500001361728	0	47	2	0			0	0	0	0	0	0
2021-01-27 08:32:00	300000499075	0	36	1	0			0	0	0	0	0	0
2021-01-27 08:36:00	300001337294	1	67	4	0			0	0	0	0	0	0
2021-01-27 08:44:00	000646755400	1	73	5	0			0	0	0	0	0	0
2021-01-27 08:50:00	300000288150	1	53	3	0			0	0	0	0	0	0
2021-01-27 08:52:00	500001360334	0	71	5	1		1	0	0	0	1	1	1
2021-01-27 08:58:00	001106455700	1	48	2	0			0	0	0	0	0	0
2021-01-27 09:05:00	200000109731	0	46	2	0			0	0	0	0	0	0
2021-01-27 09:18:00	000709694900	1	57	3	0			0	0	0	0	0	0
2021-01-27 09:32:00	500001362757	1	62	4	0			0	0	0	0	0	0
2021-01-27 09:40:00	207782	1	60	3	0			0	0	0	0	0	0
2021-01-27 09:42:00	300002747021	1	36	1	0			0	0	0	0	0	0
2021-01-27 09:50:00	000544777100	1	79	5	0			0	0	0	0	0	0
2021-01-27 09:55:00	500001360248	1	49	2	0			0	0	0	0	0	0
2021-01-27 09:55:00	500001363523	0	57	3	1	1	1	0	1	1	1	1	0
2021-01-27 10:07:00	300003250923	0	30	1	0			0	0	0	0	0	0
2021-01-27 10:19:00	300001595881	1	39	1	0			0	0	0	0	0	0
2021-01-27 10:26:00	300002534113	1	33	1	0			0	0	0	0	0	0
2021-01-27 10:39:00	001106032000	1	67	4	0			0	0	0	0	0	0
2021-01-27 10:40:00	001011012000	0	60	3	0			0	0	0	0	0	0
2021-01-27 10:45:00	500001363488	0	38	1	0			0	0	0	0	0	0
2021-01-27 10:52:00	001106476500	0	62	4	0			0	0	0	0	0	0
2021-01-27 11:00:00	500000143831	1	70	4	0			0	0	0	0	0	0
2021-01-27 11:09:00	001102399700	1	53	3	0			0	0	0	0	0	0
2021-01-27 11:10:00	500001361997	1	34	1	0			0	0	0	0	0	0
2021-01-27 11:16:00	500001361985	1	46	2	0			0	0	0	0	0	0
2021-01-27 11:24:00	000547248700	0	58	3	0			0	0	0	0	0	0
2021-01-27 11:31:00	001102402200	0	62	4	0			0	0	0	0	0	0
2021-01-27 11:43:00	000557592900	1	55	3	0			0	0	0	0	0	0
2021-01-27 11:54:00	000558245300	0	59	3	0			0	0	0	0	0	0
2021-01-27 11:55:00	001013764400	0	39	1	0			0	0	0	0	0	0
2021-01-27 12:00:00	500001361310	1	59	3	0			0	0	0	0	0	0
2021-01-27 12:03:00	300003256516	0	47	2	0			0	0	0	0	0	0
2021-01-27 12:11:00	300001106060	1	59	3	0			0	0	0	0	0	0
2021-01-27 14:25:00	300003060587	0	23	1	0			0	0	0	0	0	0
2021-01-27 14:27:00	300001674080	0	22	1	0			0	0	0	0	0	0
2021-01-27 14:30:00	500001359284	1	40	1	0			0	0	0	0	0	0
2021-01-27 14:32:00	500000931375	1	73	5	0			0	0	0	0	0	0
2021-01-27 14:34:00	300000340612	1	41	2	0			0	0	0	0	0	0
2021-01-27 14:36:00	500001246723	1	54	3	0			0	0	0	0	0	0
2021-01-27 14:37:00	300003415250	1	44	2	0			0	0	0	0	0	0
2021-01-27 14:42:00	500000163184	1	35	1	0			0	0	0	0	0	0
2021-01-27 14:46:00	300001662516	1	23	1	0			0	0	0	0	0	0
2021-01-27 14:49:00	500001360915	0	58	3	0			0	0	0	0	0	0
2021-01-27 14:51:00	000982945300	1	53	3	0			0	0	0	0	0	0
2021-01-27 14:56:00	500001360956	0	48	2	1	1		1	0	0	0	0	0
2021-01-27 15:06:00	500000435148	0	38	1	0			0	0	0	0	0	0
2021-01-27 15:06:00	500001342790	1	50	2	0			0	0	0	0	0	0
2021-01-27 15:14:00	300002450743	1	21	1	0			0	0	0	0	0	0
2021-01-27 15:15:00	500000153024	1	50	2	0			0	0	0	0	0	0
2021-01-27 15:15:00	500000203511	0	24	1	0			0	0	0	0	0	0
2021-01-27 15:16:00	500001169494	0	49	2	0			0	0	0	0	0	0
2021-01-27 15:16:00	300002335676	1	46	2	0			0	0	0	0	0	0
2021-01-27 15:20:00	500001345039	0	48	2	0			0	0	0	0	0	0
2021-01-27 15:20:00	500000948437	0	40	1	0			0	0	0	0	0	0
2021-01-27 15:21:00	500001356113	1	44	2	0			0	0	0	0	0	0
2021-01-27 15:23:00	500001360869	0	56	3	0			0	0	0	0	0	0
2021-01-27 15:31:00	300002816388	1	39	1	0			0	0	0	0	0	0
2021-01-27 15:32:00	300003302453	1	49	2	0			0	0	0	0	0	0
2021-01-27 15:33:00	300002988185	1	51	3	0			0	0	0	0	0	0
2021-01-27 15:39:00	300002791122	0	39	1	0			0	0	0	0	0	0
2021-01-27 15:40:00	500001348656	1	63	4	0			0	0	0	0	0	0
2021-01-27 15:43:00	300002443276	1	75	5	0			0	0	0	0	0	0
2021-01-27 15:43:00	300002164345	1	73	5	0			0	0	0	0	0	0
2021-01-27 15:47:00	300002571791	1	49	2	0			0	0	0	0	0	0
2021-01-27 15:49:00	500001360197	1	42	2	0			0	0	0	0	0	0
2021-01-27 15:50:00	300002371882	1	69	4	0			0	0	0	0	0	0
2021-01-27 15:58:00	300002281019	0	31	1	0			0	0	0	0	0	0
2021-01-27 15:58:00	300003510615	0	41	2	0			0	0	0	0	0	0
2021-01-27 16:00:00	500001361362	1	52	3	0			0	0	0	0	0	0
2021-01-27 16:07:00	500001362095	0	68	4	0			0	0	0	0	0	0
2021-01-27 16:10:00	500001361236	0	33	1	0			0	0	0	0	0	0
2021-01-27 16:14:00	500001353795	1	49	2	0			0	0	0	0	0	0
2021-01-27 16:16:00	300002015998	1	46	2	0			0	0	0	0	0	0
2021-01-27 16:20:00	300000081403	0	60	3	0			0	0	0	0	0	0
2021-01-27 16:22:00	500001358868	0	34	1	0			0	0	0	0	0	0
2021-01-27 16:25:00	500001361190	0	55	3	0			0	0	0	0	0	0
2021-01-27 16:28:00	500001361329	0	66	4	0			0	0	0	0	0	0
2021-01-27 16:39:00	500000459664	0	24	1	0			0	0	0	0	0	0
2021-01-27 16:42:00	300002926202	1	51	3	0			0	0	0	0	0	0
2021-01-27 16:45:00	500001093864	0	43	2	0			0	0	0	0	0	0
2021-01-27 16:45:00	500001362621	0	48	2	0			0	0	0	0	0	0
2021-01-27 16:48:00	500001361890	1	51	3	0			0	0	0	0	0	0
2021-01-27 16:55:00	300003062789	1	68	4	0			0	0	0	0	0	0
2021-01-27 16:57:00	500001361928	1	56	3	0			0	0	0	0	0	0
2021-01-27 16:58:00	300000469401	1	67	4	0			0	0	0	0	0	0
2021-01-28 08:00:00	500001365429	0	59	3	0			0	0	0	0	0	0
2021-01-28 08:11:00	300002775861	1	52	3	0			0	0	0	0	0	0
2021-01-28 08:21:00	300002321467	1	50	2	0			0	0	0	0	0	0
2021-01-28 08:25:00	000849108600	1	56	3	0			0	0	0	0	0	0
2021-01-28 08:31:00	300003043771	0	47	2	0			0	0	0	0	0	0
2021-01-28 08:41:00	500000577175	0	30	1	0			0	0	0	0	0	0
2021-01-28 08:42:00	300003429639	1	57	3	0			0	0	0	0	0	0
2021-01-28 08:45:00	300000754414	1	49	2	0			0	0	0	0	0	0
2021-01-28 08:47:00	300003113684	0	48	2	0			0	0	0	0	0	0
2021-01-28 08:53:00	001080962200	1	48	2	0			0	0	0	0	0	0
2021-01-28 08:54:00	12128039	0	56	3	0			0	0	0	0	0	0
2021-01-28 08:58:00	000806439200	1	84	5	0			0	0	0	0	0	0
2021-01-28 09:05:00	000571679800	1	79	5	0			0	0	0	0	0	0
2021-01-28 09:07:00	300003280239	1	57	3	0			0	0	0	0	0	0
2021-01-28 09:13:00	500001365846	0	52	3	0			0	0	0	0	0	0
2021-01-28 09:19:00	000849065800	1	48	2	0			0	0	0	0	0	0
2021-01-28 09:20:00	500001353559	0	46	2	0			0	0	0	0	0	0
2021-01-28 09:28:00	001106538800	1	48	2	0			0	0	0	0	0	0
2021-01-28 09:35:00	000679882500	1	45	2	0			0	0	0	0	0	0
2021-01-28 09:39:00	500001361353	1	57	3	0			0	0	0	0	0	0
2021-01-28 09:47:00	300002805593	1	43	2	0			0	0	0	0	0	0
2021-01-28 09:55:00	300000846300	0	31	1	0			0	0	0	0	0	0
2021-01-28 10:10:00	001104626500	0	52	3	0			0	0	0	0	0	0
2021-01-28 10:14:00	001085512100	1	73	5	0			0	0	0	0	0	0
2021-01-28 10:19:00	001104812400	0	64	4	0			0	0	0	0	0	0
2021-01-28 10:25:00	001105177600	0	35	1	0			0	0	0	0	0	0
2021-01-28 11:00:00	001103772300	1	57	3	0			0	0	0	0	0	0
2021-01-28 13:57:00	000837054300	1	32	1	0			0	0	0	0	0	0
2021-01-28 14:05:00	500001363162	1	18	1	0			0	0	0	0	0	0
2021-01-28 14:06:00	300003547659	0	43	2	0			0	0	0	0	0	0
2021-01-28 14:09:00	300000367377	1	54	3	0			0	0	0	0	0	0
2021-01-28 14:15:00	300003107161	0	59	3	0			0	0	0	0	0	0
2021-01-28 14:21:00	500001163185	0	37	1	0			0	0	0	0	0	0
2021-01-28 14:25:00	500001351279	1	44	2	0			0	0	0	0	0	0
2021-01-28 14:27:00	500000313968	1	53	3	0			0	0	0	0	0	0
2021-01-28 14:29:00	300001458027	1	44	2	0			0	0	0	0	0	0
2021-01-28 14:43:00	300002746171	0	52	3	0			0	0	0	0	0	0
2021-01-28 14:43:00	500000073472	0	50	2	0			0	0	0	0	0	0
2021-01-28 14:43:00	500000419552	1	50	2	0			0	0	0	0	0	0
2021-01-28 14:46:00	500001338122	1	37	1	0			0	0	0	0	0	0
2021-01-28 14:57:00	500000945218	1	40	1	0			0	0	0	0	0	0
2021-01-28 14:57:00	700478611200	1	36	1	0			0	0	0	0	0	0
2021-01-28 14:58:00	700540893000	0	37	1	0			0	0	0	0	0	0
2021-01-28 15:00:00	300000257900	0	40	1	0			0	0	0	0	0	0
2021-01-28 15:01:00	500001293787	1	66	4	0			0	0	0	0	0	0
2021-01-28 15:07:00	300003471129	1	46	2	0			0	0	0	0	0	0
2021-01-28 15:07:00	500001363512	0	49	2	1	1		0	1	0	0	0	0
2021-01-28 15:08:00	500001363656	1	53	3	0			0	0	0	0	0	0
2021-01-28 15:15:00	500001358498	1	57	3	0			0	0	0	0	0	0
2021-01-28 15:17:00	500001229144	1	48	2	0			0	0	0	0	0	0
2021-01-28 15:19:00	500001363057	0	45	2	0			0	0	0	0	0	0
2021-01-28 15:23:00	300000660643	1	44	2	0			0	0	0	0	0	0
2021-01-28 15:33:00	500001363286	0	41	2	0			0	0	0	0	0	0
2021-01-28 15:36:00	500001364335	0	42	2	0			0	0	0	0	0	0
2021-01-28 15:36:00	300001585788	0	31	1	0			0	0	0	0	0	0
2021-01-28 15:44:00	500001361662	1	50	2	0			0	0	0	0	0	0
2021-01-28 15:46:00	300001532706	0	44	2	0			0	0	0	0	0	0
2021-01-28 15:48:00	500001362820	0	47	2	0			0	0	0	0	0	0
2021-01-28 15:50:00	500001323820	1	66	4	0			0	0	0	0	0	0
2021-01-28 15:52:00	500001365230	1	52	3	0			0	0	0	0	0	0
2021-01-28 15:53:00	300002891997	0	34	1	0			0	0	0	0	0	0
2021-01-28 15:58:00	500001169496	0	33	1	0			0	0	0	0	0	0
2021-01-28 16:04:00	300000052707	1	57	3	0			0	0	0	0	0	0
2021-01-28 16:05:00	300000035988	1	58	3	0			0	0	0	0	0	0
2021-01-28 16:08:00	300002404335	1	43	2	0			0	0	0	0	0	0
2021-01-28 16:10:00	300001579658	0	44	2	0			0	0	0	0	0	0
2021-01-28 16:11:00	300002676237	1	63	4	0			0	0	0	0	0	0
2021-01-28 16:13:00	500001362716	0	22	1	0			0	0	0	0	0	0
2021-01-28 16:17:00	500001034831	1	29	1	0			0	0	0	0	0	0
2021-01-28 16:22:00	001106411900	1	62	4	0			0	0	0	0	0	0
2021-01-28 16:26:00	500001365596	1	45	2	0			0	0	0	0	0	0
2021-01-28 16:26:00	300000918562	1	55	3	0			0	0	0	0	0	0
2021-01-28 16:27:00	500001364747	1	20	1	0			0	0	0	0	0	0
2021-01-28 16:28:00	300003124424	1	55	3	0			0	0	0	0	0	0
2021-01-28 16:30:00	500001365135	0	18	1	0			0	0	0	0	0	0
2021-01-28 16:30:00	300002719583	0	36	1	0			0	0	0	0	0	0
2021-01-28 16:33:00	500000809199	1	58	3	0			0	0	0	0	0	0
2021-01-28 16:38:00	500001359564	1	70	4	0			0	0	0	0	0	0
2021-01-28 16:38:00	300000436111	1	56	3	0			0	0	0	0	0	0
2021-01-28 16:42:00	300003411923	1	56	3	0			0	0	0	0	0	0
2021-01-28 16:51:00	500001106300	1	56	3	0			0	0	0	0	0	0
2021-01-28 16:51:00	300001593602	0	53	3	0			0	0	0	0	0	0
2021-01-28 17:01:00	500001315993	0	57	3	0			0	0	0	0	0	0
2021-01-28 17:01:00	300002279753	1	42	2	0			0	0	0	0	0	0
2021-01-28 17:05:00	500001364535	1	47	2	0			0	0	0	0	0	0
2021-01-29 07:50:00	300000289398	0	50	2	0			0	0	0	0	0	0
2021-01-29 07:53:00	04380	0	32	1	0			0	0	0	0	0	0
2021-01-29 08:01:00	500001342112	0	58	3	0			0	0	0	0	0	0
2021-01-29 08:02:00	001106433800	0	56	3	0			0	0	0	0	0	0
2021-01-29 08:18:00	500001366661	0	43	2	0			0	0	0	0	0	0
2021-01-29 08:29:00	300002741766	1	29	1	0			0	0	0	0	0	0
2021-01-29 08:39:00	001096339400	1	35	1	1		1	0	0	0	0	1	0
2021-01-29 08:45:00	500001366956	1	45	2	0			0	0	0	0	0	0
2021-01-29 08:56:00	500001367357	0	48	2	0			0	0	0	0	0	0
2021-01-29 08:58:00	500001367059	0	52	3	0			0	0	0	0	0	0
2021-01-29 09:03:00	000794638500	1	71	5	0			0	0	0	0	0	0
2021-01-29 09:09:00	500001296867	0	23	1	0			0	0	0	0	0	0
2021-01-29 09:11:00	500000729520	0	29	1	0			0	0	0	0	0	0
2021-01-29 09:26:00	500000167487	0	69	4	0			0	0	0	0	0	0
2021-01-29 09:28:00	000558146800	0	67	4	0			0	0	0	0	0	0
2021-01-29 09:40:00	300003190931	1	55	3	0			0	0	0	0	0	0
2021-01-29 09:43:00	500001366235	1	43	2	0			0	0	0	0	0	0
2021-01-29 09:44:00	500001366960	1	58	3	0			0	0	0	0	0	0
2021-01-29 09:51:00	000915783000	0	62	4	1	1		1	0	0	0	0	0
2021-01-29 09:59:00	001107312000	0	50	2	0			0	0	0	0	0	0
2021-01-29 10:05:00	001104046700	0	29	1	0			0	0	0	0	0	0
2021-01-29 10:27:00	000722084900	1	45	2	0			0	0	0	0	0	0
2021-01-29 10:31:00	001107217200	1	47	2	0			0	0	0	0	0	0
2021-01-29 10:33:00	300002520303	0	35	1	0			0	0	0	0	0	0
2021-01-29 10:46:00	300002707848	1	39	1	0			0	0	0	0	0	0
2021-01-29 10:48:00	300003611728	0	54	3	0			0	0	0	0	0	0
2021-01-29 10:50:00	500001368413	1	54	3	1	1		1	0	0	0	0	0
2021-01-29 10:56:00	500001370072	1	47	2	0			0	0	0	0	0	0
2021-01-29 11:05:00	300002716850	0	36	1	0			0	0	0	0	0	0
2021-01-29 11:07:00	12221210	1	58	3	0			0	0	0	0	0	0
2021-01-29 11:09:00	300002314989	1	52	3	0			0	0	0	0	0	0
2021-01-29 11:37:00	000101870500	1	33	1	0			0	0	0	0	0	0
2021-01-29 14:01:00	500001358980	1	35	1	0			0	0	0	0	0	0
2021-01-29 14:01:00	500001366412	0	31	1	0			0	0	0	0	0	0
2021-01-29 14:02:00	300003199552	1	70	4	0			0	0	0	0	0	0
2021-01-29 14:10:00	500001364797	1	34	1	0			0	0	0	0	0	0
2021-01-29 14:13:00	300001452778	0	34	1	0			0	0	0	0	0	0
2021-01-29 14:19:00	300000827010	0	34	1	0			0	0	0	0	0	0
2021-01-29 14:22:00	500001366541	1	62	4	0			0	0	0	0	0	0
2021-01-29 14:26:00	500001123963	1	58	3	0			0	0	0	0	0	0
2021-01-29 14:26:00	300001397492	1	36	1	0			0	0	0	0	0	0
2021-01-29 14:31:00	500001366843	0	54	3	0			0	0	0	0	0	0
2021-01-29 14:32:00	300001972952	1	54	3	1	1		0	1	0	0	0	0
2021-01-29 14:33:00	500001366334	0	37	1	0			0	0	0	0	0	0
2021-01-29 14:35:00	500001353948	0	79	5	0			0	0	0	0	0	0
2021-01-29 14:37:00	500001366352	1	29	1	0			0	0	0	0	0	0
2021-01-29 14:40:00	500000806743	1	51	3	0			0	0	0	0	0	0
2021-01-29 14:41:00	500001367483	0	35	1	0			0	0	0	0	0	0
2021-01-29 14:43:00	300002322468	1	36	1	0			0	0	0	0	0	0
2021-01-29 14:49:00	500001365788	1	35	1	0			0	0	0	0	0	0
2021-01-29 14:50:00	300002194325	1	41	2	0			0	0	0	0	0	0
2021-01-29 14:51:00	500000492174	0	18	1	0			0	0	0	0	0	0
2021-01-29 14:52:00	300001657928	0	44	2	0			0	0	0	0	0	0
2021-01-29 14:56:00	500001363259	1	66	4	0			0	0	0	0	0	0
2021-01-29 14:58:00	300000535179	1	36	1	0			0	0	0	0	0	0
2021-01-29 14:58:00	300002936024	0	33	1	0			0	0	0	0	0	0
2021-01-29 15:04:00	300002691120	1	23	1	0			0	0	0	0	0	0
2021-01-29 15:06:00	300003615233	0	60	3	0			0	0	0	0	0	0
2021-01-29 15:07:00	300002415182	0	40	1	0			0	0	0	0	0	0
2021-01-29 15:08:00	500001363821	0	52	3	0			0	0	0	0	0	0
2021-01-29 15:13:00	500000056909	1	41	2	0			0	0	0	0	0	0
2021-01-29 15:18:00	500001367577	0	74	5	0			0	0	0	0	0	0
2021-01-29 15:19:00	500001359945	1	44	2	0			0	0	0	0	0	0
2021-01-29 15:20:00	300003519008	0	35	1	0			0	0	0	0	0	0
2021-01-29 15:22:00	300001056150	0	34	1	0			0	0	0	0	0	0
2021-01-29 15:30:00	300000532201	1	58	3	0			0	0	0	0	0	0
2021-01-29 15:31:00	500000848708	1	47	2	0			0	0	0	0	0	0
2021-01-29 15:34:00	500001331273	1	64	4	0			0	0	0	0	0	0
2021-01-29 15:34:00	500000483287	1	49	2	0			0	0	0	0	0	0
2021-01-29 15:40:00	500001367178	1	59	3	0			0	0	0	0	0	0
2021-01-29 15:42:00	500000604060	0	19	1	0			0	0	0	0	0	0
2021-01-29 15:43:00	10859203	1	54	3	0			0	0	0	0	0	0
2021-01-29 15:52:00	500001366852	0	47	2	0			0	0	0	0	0	0
2021-01-29 15:52:00	300000187037	1	62	4	0			0	0	0	0	0	0
2021-01-29 15:54:00	12952203	1	37	1	0			0	0	0	0	0	0
2021-01-29 15:58:00	300002268333	0	43	2	0			0	0	0	0	0	0
2021-01-29 15:59:00	500001366415	1	30	1	0			0	0	0	0	0	0
2021-01-29 16:04:00	500001367709	1	21	1	0			0	0	0	0	0	0
2021-01-29 16:04:00	500000062814	1	46	2	0			0	0	0	0	0	0
2021-01-29 16:11:00	300002098814	0	34	1	0			0	0	0	0	0	0
2021-01-29 16:13:00	300002435675	0	33	1	0			0	0	0	0	0	0
2021-01-29 16:15:00	300002930126	1	34	1	0			0	0	0	0	0	0
2021-01-29 16:21:00	500001366506	1	52	3	0			0	0	0	0	0	0
2021-01-29 16:21:00	300002569483	1	43	2	0			0	0	0	0	0	0
2021-01-29 16:22:00	500000138563	0	44	2	0			0	0	0	0	0	0
2021-01-29 16:28:00	500001367561	0	67	4	0			0	0	0	0	0	0
2021-01-29 16:29:00	300000981328	1	33	1	0			0	0	0	0	0	0
2021-01-29 16:29:00	500000268501	0	26	1	0			0	0	0	0	0	0
2021-01-29 16:31:00	500001261359	1	35	1	0			0	0	0	0	0	0
2021-01-29 16:45:00	500001367781	1	65	4	0			0	0	0	0	0	0
2021-01-31 10:29:00	001067557500	1	46	2	0			0	0	0	0	0	0
2021-02-01 08:02:00	500001367646	1	37	1	0			0	0	0	0	0	0
2021-02-01 08:03:00	500001369638	1	29	1	0			0	0	0	0	0	0
2021-02-01 08:15:00	300003571681	1	40	1	0			0	0	0	0	0	0
2021-02-01 08:19:00	300002634048	1	44	2	0			0	0	0	0	0	0
2021-02-01 08:33:00	001104691800	0	57	3	0			0	0	0	0	0	0
2021-02-01 08:40:00	300003398253	0	24	1	0			0	0	0	0	0	0
2021-02-01 08:42:00	500001366822	0	56	3	0			0	0	0	0	0	0
2021-02-01 08:49:00	300001088567	1	52	3	0			0	0	0	0	0	0
2021-02-01 08:53:00	001104691900	0	58	3	1	1		1	0	0	0	0	0
2021-02-01 08:54:00	300000120469	1	50	2	0			0	0	0	0	0	0
2021-02-01 08:57:00	500001372140	1	29	1	0			0	0	0	0	0	0
2021-02-01 09:14:00	500001368757	1	49	2	0			0	0	0	0	0	0
2021-02-01 09:21:00	500001246543	0	54	3	0			0	0	0	0	0	0
2021-02-01 09:24:00	300002907769	0	48	2	0			0	0	0	0	0	0
2021-02-01 09:36:00	300002091884	0	34	1	0			0	0	0	0	0	0
2021-02-01 09:37:00	001106070300	1	38	1	0			0	0	0	0	0	0
2021-02-01 09:37:00	500001373328	0	54	3	0			0	0	0	0	0	0
2021-02-01 09:47:00	300003040923	0	55	3	0			0	0	0	0	0	0
2021-02-01 09:48:00	0007694474600	0	64	4	0			0	0	0	0	0	0
2021-02-01 09:57:00	500001373318	1	44	2	0			0	0	0	0	0	0
2021-02-01 09:57:00	500001373053	1	56	3	0			0	0	0	0	0	0
2021-02-01 09:58:00	001106348100	0	64	4	0			0	0	0	0	0	0
2021-02-01 10:02:00	001107522900	1	56	3	0			0	0	0	0	0	0
2021-02-01 10:05:00	001107279700	1	51	3	0			0	0	0	0	0	0
2021-02-01 10:13:00	001057045000	1	46	2	0			0	0	0	0	0	0
2021-02-01 10:20:00	500001367806	0	44	2	0			0	0	0	0	0	0
2021-02-01 10:25:00	000734038800	1	75	5	0			0	0	0	0	0	0
2021-02-01 10:37:00	001106078300	0	62	4	0			0	0	0	0	0	0
2021-02-01 10:58:00	500000238765	0	54	3	0			0	0	0	0	0	0
2021-02-01 11:07:00	500001370832	0	48	2	0			0	0	0	0	0	0
2021-02-01 11:09:00	500001361525	0	37	1	0			0	0	0	0	0	0
2021-02-01 11:26:00	500001177765	0	32	1	0			0	0	0	0	0	0
2021-02-01 11:34:00	300001510295	0	45	2	0			0	0	0	0	0	0
2021-02-01 11:38:00	300002457448	0	25	1	0			0	0	0	0	0	0
2021-02-01 12:13:00	001106405200	0	48	2	0			0	0	0	0	0	0
2021-02-01 12:21:00	001107899300	0	20	1	0			0	0	0	0	0	0
2021-02-01 13:59:00	300000276358	1	25	1	0			0	0	0	0	0	0
2021-02-01 14:04:00	500000080060	0	35	1	0			0	0	0	0	0	0
2021-02-01 14:05:00	500001369434	1	44	2	0			0	0	0	0	0	0
2021-02-01 14:06:00	500001368883	0	48	2	0			0	0	0	0	0	0
2021-02-01 14:10:00	500000325199	1	40	1	0			0	0	0	0	0	0
2021-02-01 14:14:00	200000100209	1	40	1	0			0	0	0	0	0	0
2021-02-01 14:16:00	001107452900	0	41	2	1	1		1	0	0	0	0	0
2021-02-01 14:27:00	500000994882	0	67	4	0			0	0	0	0	0	0
2021-02-01 14:30:00	300000796213	1	51	3	0			0	0	0	0	0	0
2021-02-01 14:31:00	300001854725	1	29	1	0			0	0	0	0	0	0
2021-02-01 14:33:00	300003036284	0	55	3	0			0	0	0	0	0	0
2021-02-01 14:35:00	300001213290	0	43	2	0			0	0	0	0	0	0
2021-02-01 14:38:00	300001312320	0	56	3	0			0	0	0	0	0	0
2021-02-01 14:39:00	300001445995	0	33	1	0			0	0	0	0	0	0
2021-02-01 14:40:00	500000716665	1	66	4	0			0	0	0	0	0	0
2021-02-01 14:44:00	300002436810	0	48	2	0			0	0	0	0	0	0
2021-02-01 14:47:00	300002134693	0	47	2	0			0	0	0	0	0	0
2021-02-01 14:49:00	500001371428	0	36	1	0			0	0	0	0	0	0
2021-02-01 15:00:00	500000316848	1	40	1	0			0	0	0	0	0	0
2021-02-01 15:02:00	300003233878	0	36	1	0			0	0	0	0	0	0
2021-02-01 15:07:00	500001116177	1	52	3	0			0	0	0	0	0	0
2021-02-01 15:10:00	300003367799	1	50	2	0			0	0	0	0	0	0
2021-02-01 15:11:00	300003434708	1	27	1	0			0	0	0	0	0	0
2021-02-01 15:11:00	300000974784	1	62	4	0			0	0	0	0	0	0
2021-02-01 15:12:00	500001369920	1	53	3	0			0	0	0	0	0	0
2021-02-01 15:12:00	500001371585	0	63	4	0			0	0	0	0	0	0
2021-02-01 15:15:00	500001369930	0	58	3	0			0	0	0	0	0	0
2021-02-01 15:17:00	300003416350	1	63	4	0			0	0	0	0	0	0
2021-02-01 15:21:00	200000026114	1	36	1	0			0	0	0	0	0	0
2021-02-01 15:27:00	11276660	1	44	2	0			0	0	0	0	0	0
2021-02-01 15:30:00	300003081541	1	37	1	0			0	0	0	0	0	0
2021-02-01 15:33:00	300001360595	0	37	1	0			0	0	0	0	0	0
2021-02-01 15:34:00	300003305038	0	45	2	0			0	0	0	0	0	0
2021-02-01 15:41:00	300002963690	0	49	2	0			0	0	0	0	0	0
2021-02-01 15:43:00	500001370352	0	45	2	0			0	0	0	0	0	0
2021-02-01 15:44:00	300003040491	0	46	2	0			0	0	0	0	0	0
2021-02-01 15:49:00	500001370574	1	30	1	0			0	0	0	0	0	0
2021-02-01 15:52:00	500001373052	0	46	2	0			0	0	0	0	0	0
2021-02-01 15:52:00	500001370878	0	48	2	0			0	0	0	0	0	0
2021-02-01 15:54:00	500001369976	1	47	2	0			0	0	0	0	0	0
2021-02-01 15:55:00	500000855760	0	49	2	0			0	0	0	0	0	0
2021-02-01 15:56:00	300001470490	0	46	2	0			0	0	0	0	0	0
2021-02-01 15:56:00	300002393877	0	31	1	0			0	0	0	0	0	0
2021-02-01 16:03:00	300000319768	0	32	1	0			0	0	0	0	0	0
2021-02-01 16:03:00	300003307393	0	29	1	0			0	0	0	0	0	0
2021-02-01 16:04:00	200000031896	0	70	4	0			0	0	0	0	0	0
2021-02-01 16:09:00	500001366985	1	33	1	0			0	0	0	0	0	0
2021-02-01 16:13:00	500001359908	1	65	4	0			0	0	0	0	0	0
2021-02-01 16:14:00	300001535954	1	61	4	0			0	0	0	0	0	0
2021-02-01 16:21:00	500000866529	0	29	1	0			0	0	0	0	0	0
2021-02-01 16:29:00	500001225545	0	27	1	0			0	0	0	0	0	0
2021-02-01 16:30:00	300000004307	0	32	1	0			0	0	0	0	0	0
2021-02-01 16:31:00	500001371635	0	72	5	0			0	0	0	0	0	0
2021-02-01 16:36:00	001107783400	0	18	1	0			0	0	0	0	0	0
2021-02-01 16:36:00	500001336017	0	57	3	0			0	0	0	0	0	0
2021-02-01 16:37:00	500001372002	1	45	2	0			0	0	0	0	0	0
2021-02-01 16:38:00	500001370635	0	47	2	0			0	0	0	0	0	0
2021-02-01 16:40:00	500001372500	0	50	2	0			0	0	0	0	0	0
2021-02-01 16:43:00	500001372207	0	28	1	0			0	0	0	0	0	0
2021-02-01 16:48:00	500001354826	0	25	1	0			0	0	0	0	0	0
2021-02-01 16:51:00	500000807095	0	32	1	0			0	0	0	0	0	0
2021-02-01 16:52:00	300002503023	0	52	3	0			0	0	0	0	0	0
2021-02-01 17:00:00	300001384287	1	57	3	0			0	0	0	0	0	0
2021-02-01 17:00:00	500001372133	1	46	2	0			0	0	0	0	0	0
2021-02-02 08:01:00	300001126741	0	35	1	0			0	0	0	0	0	0
2021-02-02 08:01:00	300003140797	1	75	5	0			0	0	0	0	0	0
2021-02-02 08:11:00	300003143055	0	58	3	0			0	0	0	0	0	0
2021-02-02 08:13:00	300003292183	1	42	2	0			0	0	0	0	0	0
2021-02-02 08:18:00	500000184083	1	59	3	0			0	0	0	0	0	0
2021-02-02 08:25:00	300000035737	0	29	1	0			0	0	0	0	0	0
2021-02-02 08:33:00	001074373800	0	50	2	1	1		1	1	0	0	0	0
2021-02-02 08:40:00	001108090100	0	51	3	0			0	0	0	0	0	0
2021-02-02 08:47:00	13027889	0	54	3	0			0	0	0	0	0	0
2021-02-02 08:53:00	300000173597	0	46	2	0			0	0	0	0	0	0
2021-02-02 08:56:00	200000054709	1	37	1	0			0	0	0	0	0	0
2021-02-02 08:57:00	300000454356	0	71	5	0			0	0	0	0	0	0
2021-02-02 09:03:00	500001370692	1	40	1	0			0	0	0	0	0	0
2021-02-02 09:07:00	001032053300	1	56	3	0			0	0	0	0	0	0
2021-02-02 09:26:00	001108278400	1	36	1	0			0	0	0	0	0	0
2021-02-02 09:29:00	000795401300	1	55	3	0			0	0	0	0	0	0
2021-02-02 09:39:00	300003160035	0	41	2	0			0	0	0	0	0	0
2021-02-02 09:57:00	001106830400	1	65	4	0			0	0	0	0	0	0
2021-02-02 09:59:00	300001052986	1	49	2	0			0	0	0	0	0	0
2021-02-02 10:17:00	001107961000	1	56	3	0			0	0	0	0	0	0
2021-02-02 10:19:00	300003331370	0	65	4	0			0	0	0	0	0	0
2021-02-02 10:38:00	300002875327	0	39	1	0			0	0	0	0	0	0
2021-02-02 10:55:00	300003284945	1	69	4	0			0	0	0	0	0	0
2021-02-02 11:00:00	300001270302	1	45	2	0			0	0	0	0	0	0
2021-02-03 07:54:00	000456169300	1	65	4	0			0	0	0	0	0	0
2021-02-03 07:59:00	300001236774	0	49	2	0			0	0	0	0	0	0
2021-02-03 07:59:00	300001566192	1	36	1	0			0	0	0	0	0	0
2021-02-03 08:11:00	200000093301	1	72	5	0			0	0	0	0	0	0
2021-02-03 08:22:00	000681732200	0	48	2	0			0	0	0	0	0	0
2021-02-03 08:23:00	001006634900	0	71	5	0			0	0	0	0	0	0
2021-02-03 08:30:00	001108418300	1	52	3	0			0	0	0	0	0	0
2021-02-03 08:40:00	000340101600	1	58	3	0			0	0	0	0	0	0
2021-02-03 08:43:00	001108170500	0	53	3	0			0	0	0	0	0	0
2021-02-03 08:46:00	300001412726	0	43	2	0			0	0	0	0	0	0
2021-02-03 08:52:00	000844379300	1	58	3	0			0	0	0	0	0	0
2021-02-03 09:03:00	500001375224	0	51	3	0			0	0	0	0	0	0
2021-02-03 09:08:00	300002728708	0	50	2	0			0	0	0	0	0	0
2021-02-03 09:11:00	000128323200	1	52	3	0			0	0	0	0	0	0
2021-02-03 09:12:00	001108241800	0	21	1	0			0	0	0	0	0	0
2021-02-03 09:16:00	001105736000	1	53	3	0			0	0	0	0	0	0
2021-02-03 09:17:00	300002255412	1	45	2	1	1		1	1	0	0	0	0
2021-02-03 09:18:00	000883936600	1	53	3	0			0	0	0	0	0	0
2021-02-03 09:24:00	300002998308	0	47	2	0			0	0	0	0	0	0
2021-02-03 09:26:00	300002416239	0	38	1	0			0	0	0	0	0	0
2021-02-03 09:30:00	12359548	0	58	3	0			0	0	0	0	0	0
2021-02-03 09:30:00	001106233300	0	48	2	0			0	0	0	0	0	0
2021-02-03 09:45:00	500000742676	0	63	4	1	1		1	0	0	0	0	0
2021-02-03 10:06:00	300003083908	0	63	4	0			0	0	0	0	0	0
2021-02-03 10:10:00	300002567038	0	26	1	0			0	0	0	0	0	0
2021-02-03 10:31:00	500001369472	0	38	1	0			0	0	0	0	0	0
2021-02-03 10:32:00	500001334755	1	58	3	0			0	0	0	0	0	0
2021-02-03 10:32:00	000964043600	1	47	2	0			0	0	0	0	0	0
2021-02-03 11:04:00	500001378967	0	65	4	0			0	0	0	0	0	0
2021-02-03 11:17:00	500001369898	0	56	3	0			0	0	0	0	0	0
2021-02-03 14:00:00	500000470281	1	46	2	0			0	0	0	0	0	0
2021-02-03 14:01:00	500001373064	1	68	4	0			0	0	0	0	0	0
2021-02-03 14:02:00	500001377178	0	31	1	0			0	0	0	0	0	0
2021-02-03 14:03:00	300002994397	0	48	2	0			0	0	0	0	0	0
2021-02-03 14:10:00	300003593789	0	56	3	0			0	0	0	0	0	0
2021-02-03 14:11:00	11644391	0	61	4	0			0	0	0	0	0	0
2021-02-03 14:18:00	500001372747	0	32	1	0			0	0	0	0	0	0
2021-02-03 14:20:00	000904020900	1	65	4	0			0	0	0	0	0	0
2021-02-03 14:24:00	500001373070	1	43	2	0			0	0	0	0	0	0
2021-02-03 14:27:00	300002998092	1	49	2	0			0	0	0	0	0	0
2021-02-03 14:31:00	500000750498	1	43	2	0			0	0	0	0	0	0
2021-02-03 14:33:00	300002822374	1	41	2	0			0	0	0	0	0	0
2021-02-03 14:34:00	300003071346	0	22	1	0			0	0	0	0	0	0
2021-02-03 14:36:00	500001361854	1	39	1	0			0	0	0	0	0	0
2021-02-03 14:41:00	001045709800	1	64	4	0			0	0	0	0	0	0
2021-02-03 14:42:00	500001346698	1	18	1	0			0	0	0	0	0	0
2021-02-03 14:47:00	500001358735	1	75	5	0			0	0	0	0	0	0
2021-02-03 14:49:00	500000160660	1	42	2	0			0	0	0	0	0	0
2021-02-03 14:50:00	300000325473	1	66	4	0			0	0	0	0	0	0
2021-02-03 14:55:00	500001374643	1	56	3	0			0	0	0	0	0	0
2021-02-03 14:58:00	300003131188	0	34	1	0			0	0	0	0	0	0
2021-02-03 15:02:00	300002740590	1	46	2	0			0	0	0	0	0	0
2021-02-03 15:06:00	000659684100	0	37	1	0			0	0	0	0	0	0
2021-02-03 15:07:00	500000697608	0	33	1	0			0	0	0	0	0	0
2021-02-03 15:08:00	500000853247	0	24	1	0			0	0	0	0	0	0
2021-02-03 15:10:00	500001230445	1	41	2	0			0	0	0	0	0	0
2021-02-03 15:11:00	300001380264	1	60	3	0			0	0	0	0	0	0
2021-02-03 15:11:00	500000936778	1	56	3	0			0	0	0	0	0	0
2021-02-03 15:12:00	300000229056	1	64	4	0			0	0	0	0	0	0
2021-02-03 15:18:00	300002853719	0	29	1	0			0	0	0	0	0	0
2021-02-03 15:26:00	500000028970	0	27	1	0			0	0	0	0	0	0
2021-02-03 15:28:00	500000920642	0	42	2	0			0	0	0	0	0	0
2021-02-03 15:30:00	500000727005	0	29	1	0			0	0	0	0	0	0
2021-02-03 15:31:00	500000646307	1	47	2	0			0	0	0	0	0	0
2021-02-03 15:35:00	500001375245	0	56	3	0			0	0	0	0	0	0
2021-02-03 15:40:00	500001375033	1	50	2	0			0	0	0	0	0	0
2021-02-03 15:41:00	300003279337	1	50	2	0			0	0	0	0	0	0
2021-02-03 15:45:00	500000897194	1	50	2	1	1		0	1	0	0	0	0
2021-02-03 15:46:00	500000029135	1	46	2	0			0	0	0	0	0	0
2021-02-03 15:46:00	500001374574	0	52	3	0			0	0	0	0	0	0
2021-02-03 15:49:00	500001210685	1	42	2	0			0	0	0	0	0	0
2021-02-03 15:53:00	500000733061	0	62	4	0			0	0	0	0	0	0
2021-02-03 15:55:00	300001968986	1	55	3	0			0	0	0	0	0	0
2021-02-03 16:02:00	300000418748	1	66	4	0			0	0	0	0	0	0
2021-02-03 16:06:00	300002563913	1	57	3	0			0	0	0	0	0	0
2021-02-03 16:10:00	500001374777	1	39	1	0			0	0	0	0	0	0
2021-02-03 16:10:00	500001361189	0	58	3	0			0	0	0	0	0	0
2021-02-03 16:22:00	500000848474	1	52	3	0			0	0	0	0	0	0
2021-02-03 16:24:00	500001374428	0	35	1	0			0	0	0	0	0	0
2021-02-03 16:25:00	500001367662	1	44	2	0			0	0	0	0	0	0
2021-02-03 16:30:00	300002015272	1	56	3	0			0	0	0	0	0	0
2021-02-03 16:32:00	300002013626	1	70	4	1	1		0	1	1	0	0	0
2021-02-03 16:42:00	500001374024	1	66	4	0			0	0	0	0	0	0
2021-02-03 16:42:00	500001375446	0	38	1	1	1		1	0	0	0	0	0
2021-02-03 16:44:00	300001483108	1	47	2	0			0	0	0	0	0	0
2021-02-03 16:45:00	300002318434	1	49	2	0			0	0	0	0	0	0
2021-02-03 16:48:00	500001375880	1	53	3	0			0	0	0	0	0	0
2021-02-03 16:50:00	500000819163	0	30	1	1	1		1	0	0	0	0	0
2021-02-04 08:01:00	500001374749	1	32	1	0			0	0	0	0	0	0
2021-02-04 08:02:00	12148708	1	56	3	0			0	0	0	0	0	0
2021-02-04 08:10:00	300002387980	0	57	3	0			0	0	0	0	0	0
2021-02-04 08:11:00	300003323987	1	43	2	0			0	0	0	0	0	0
2021-02-04 08:14:00	001109090600	0	44	2	0			0	0	0	0	0	0
2021-02-04 08:34:00	500001379406	0	64	4	0			0	0	0	0	0	0
2021-02-04 08:37:00	300002664028	1	53	3	0			0	0	0	0	0	0
2021-02-04 08:52:00	001096934500	1	45	2	0			0	0	0	0	0	0
2021-02-04 09:02:00	300003471959	1	48	2	0			0	0	0	0	0	0
2021-02-04 09:02:00	000760487000	1	53	3	0			0	0	0	0	0	0
2021-02-04 09:04:00	300003389873	0	39	1	0			0	0	0	0	0	0
2021-02-04 09:05:00	500001371503	0	18	1	0			0	0	0	0	0	0
2021-02-04 09:17:00	500001264566	1	50	2	0			0	0	0	0	0	0
2021-02-04 09:37:00	001038970900	0	43	2	0			0	0	0	0	0	0
2021-02-04 09:46:00	300002524114	1	27	1	0			0	0	0	0	0	0
2021-02-04 09:52:00	500001379123	1	60	3	0			0	0	0	0	0	0
2021-02-04 10:04:00	001108882500	1	58	3	0			0	0	0	0	0	0
2021-02-04 10:06:00	500000800115	0	28	1	0			0	0	0	0	0	0
2021-02-04 10:12:00	001108860600	1	71	5	0			0	0	0	0	0	0
2021-02-04 10:13:00	300002783645	1	53	3	0			0	0	0	0	0	0
2021-02-04 10:21:00	001004061200	1	47	2	0			0	0	0	0	0	0
2021-02-04 10:23:00	500000044198	0	37	1	0			0	0	0	0	0	0
2021-02-04 10:29:00	300000636097	1	59	3	0			0	0	0	0	0	0
2021-02-04 10:35:00	300003283096	0	42	2	0			0	0	0	0	0	0
2021-02-04 10:47:00	000777839500	1	44	2	0			0	0	0	0	0	0
2021-02-04 11:32:00	001108996900	1	47	2	0			0	0	0	0	0	0
2021-02-04 13:56:00	500001315088	1	28	1	0			0	0	0	0	0	0
2021-02-04 14:01:00	500000503295	1	41	2	0			0	0	0	0	0	0
2021-02-04 14:01:00	500001374460	0	42	2	0			0	0	0	0	0	0
2021-02-04 14:02:00	300003524920	1	43	2	0			0	0	0	0	0	0
2021-02-04 14:02:00	11115609	1	46	2	0			0	0	0	0	0	0
2021-02-04 14:03:00	500001380632	0	57	3	0			0	0	0	0	0	0
2021-02-04 14:04:00	300000160782	1	61	4	1	1		1	0	0	0	0	0
2021-02-04 14:06:00	300001519172	1	31	1	0			0	0	0	0	0	0
2021-02-04 14:07:00	300000534788	1	52	3	0			0	0	0	0	0	0
2021-02-04 14:14:00	500001374868	0	46	2	0			0	0	0	0	0	0
2021-02-04 14:19:00	500001376058	0	45	2	0			0	0	0	0	0	0
2021-02-04 14:24:00	300002095781	0	54	3	0			0	0	0	0	0	0
2021-02-04 14:24:00	300000287771	0	47	2	0			0	0	0	0	0	0
2021-02-04 14:24:00	000792173400	0	57	3	0			0	0	0	0	0	0
2021-02-04 14:25:00	300003292668	1	58	3	0			0	0	0	0	0	0
2021-02-04 14:26:00	300002716368	1	63	4	0			0	0	0	0	0	0
2021-02-04 14:31:00	500001205771	0	39	1	0			0	0	0	0	0	0
2021-02-04 14:39:00	300003224335	1	69	4	0			0	0	0	0	0	0
2021-02-04 14:43:00	500001376063	0	46	2	0			0	0	0	0	0	0
2021-02-04 14:45:00	500001360333	0	42	2	0			0	0	0	0	0	0
2021-02-04 14:54:00	500001375067	0	46	2	0			0	0	0	0	0	0
2021-02-04 14:56:00	300000076467	0	51	3	0			0	0	0	0	0	0
2021-02-04 14:58:00	300003199734	0	65	4	0			0	0	0	0	0	0
2021-02-04 15:05:00	300002142014	1	51	3	0			0	0	0	0	0	0
2021-02-04 15:12:00	500001377319	1	60	3	0			0	0	0	0	0	0
2021-02-04 15:16:00	300000277277	1	42	2	0			0	0	0	0	0	0
2021-02-04 15:20:00	300000748062	0	68	4	0			0	0	0	0	0	0
2021-02-04 15:20:00	500001376938	0	60	3	0			0	0	0	0	0	0
2021-02-04 15:31:00	500001377446	1	54	3	0			0	0	0	0	0	0
2021-02-04 15:31:00	300002800171	1	49	2	0			0	0	0	0	0	0
2021-02-04 15:32:00	500001371312	1	56	3	1	1		1	0	0	0	0	0
2021-02-04 15:33:00	500001377383	1	45	2	0			0	0	0	0	0	0
2021-02-04 15:39:00	500000409524	0	64	4	0			0	0	0	0	0	0
2021-02-04 15:40:00	300002289423	1	53	3	0			0	0	0	0	0	0
2021-02-04 15:41:00	300001091731	1	44	2	0			0	0	0	0	0	0
2021-02-04 15:42:00	500001377866	0	44	2	0			0	0	0	0	0	0
2021-02-04 15:44:00	500001378011	1	48	2	0			0	0	0	0	0	0
2021-02-04 15:47:00	500001375834	1	29	1	0			0	0	0	0	0	0
2021-02-04 15:50:00	500001376702	1	47	2	0			0	0	0	0	0	0
2021-02-04 15:52:00	500001377213	0	43	2	0			0	0	0	0	0	0
2021-02-04 15:53:00	300003257368	0	55	3	0			0	0	0	0	0	0
2021-02-04 15:53:00	500001377067	1	40	1	0			0	0	0	0	0	0
2021-02-04 15:54:00	300000860014	0	55	3	0			0	0	0	0	0	0
2021-02-04 15:59:00	300002642547	0	40	1	0			0	0	0	0	0	0
2021-02-04 16:09:00	500000913101	0	55	3	0			0	0	0	0	0	0
2021-02-04 16:10:00	500000549228	1	47	2	0			0	0	0	0	0	0
2021-02-04 16:13:00	500000808495	1	43	2	0			0	0	0	0	0	0
2021-02-04 16:13:00	500001374925	1	72	5	0			0	0	0	0	0	0
2021-02-04 16:18:00	300001850327	1	41	2	0			0	0	0	0	0	0
2021-02-04 16:20:00	300002901719	0	37	1	0			0	0	0	0	0	0
2021-02-04 16:22:00	13395501	1	51	3	0			0	0	0	0	0	0
2021-02-04 16:27:00	300001927026	0	34	1	0			0	0	0	0	0	0
2021-02-04 16:28:00	300000194281	1	58	3	0			0	0	0	0	0	0
2021-02-04 16:34:00	500000195741	0	55	3	0			0	0	0	0	0	0
2021-02-04 16:35:00	300001431160	0	46	2	0			0	0	0	0	0	0
2021-02-04 16:37:00	500001378765	0	35	1	0			0	0	0	0	0	0
2021-02-04 16:41:00	300002064053	1	42	2	0			0	0	0	0	0	0
2021-02-04 16:43:00	500001379752	0	31	1	0			0	0	0	0	0	0
2021-02-04 16:51:00	0300012	1	51	3	0			0	0	0	0	0	0
2021-02-04 16:59:00	300003036380	1	38	1	0			0	0	0	0	0	0
2021-02-04 17:04:00	300000648848	1	52	3	0			0	0	0	0	0	0
2021-02-04 17:19:00	300002705696	1	45	2	0			0	0	0	0	0	0
2021-02-05 07:57:00	500001379676	0	54	3	1	1		1	0	0	0	0	0
2021-02-05 07:59:00	500001381340	0	43	2	0			0	0	0	0	0	0
2021-02-05 08:01:00	001087053100	0	53	3	0			0	0	0	0	0	0
2021-02-05 08:05:00	300001373389	0	50	2	0			0	0	0	0	0	0
2021-02-05 08:14:00	300002045021	0	49	2	1	1		0	1	0	0	0	0
2021-02-05 08:19:00	001106246200	0	54	3	0			0	0	0	0	0	0
2021-02-05 08:22:00	500001362516	1	48	2	0			0	0	0	0	0	0
2021-02-05 08:24:00	300002787703	0	67	4	0			0	0	0	0	0	0
2021-02-05 08:25:00	300001982643	1	52	3	0			0	0	0	0	0	0
2021-02-05 08:26:00	500000809528	1	49	2	0			0	0	0	0	0	0
2021-02-05 08:41:00	300002239709	1	56	3	0			0	0	0	0	0	0
2021-02-05 08:44:00	500001382332	0	65	4	0			0	0	0	0	0	0
2021-02-05 08:44:00	300003099493	0	32	1	0			0	0	0	0	0	0
2021-02-05 08:44:00	500001182404	0	35	1	0			0	0	0	0	0	0
2021-02-05 08:51:00	300001562682	1	41	2	0			0	0	0	0	0	0
2021-02-05 08:56:00	300001412536	0	47	2	0			0	0	0	0	0	0
2021-02-05 09:00:00	500001376397	1	49	2	0			0	0	0	0	0	0
2021-02-05 09:02:00	300003065939	0	36	1	1	1		1	0	0	0	0	0
2021-02-05 09:18:00	500001246886	0	65	4	0			0	0	0	0	0	0
2021-02-05 09:22:00	500001381605	0	52	3	0			0	0	0	0	0	0
2021-02-05 09:26:00	300002829823	1	35	1	0			0	0	0	0	0	0
2021-02-05 09:29:00	001107965700	1	52	3	0			0	0	0	0	0	0
2021-02-05 09:35:00	001095584800	0	76	5	0			0	0	0	0	0	0
2021-02-05 09:41:00	300001846528	1	49	2	0			0	0	0	0	0	0
2021-02-05 09:42:00	500001362225	0	38	1	0			0	0	0	0	0	0
2021-02-05 09:43:00	000925768300	1	44	2	0			0	0	0	0	0	0
2021-02-05 09:49:00	500000421636	0	61	4	0			0	0	0	0	0	0
2021-02-05 10:08:00	03004	1	30	1	0			0	0	0	0	0	0
2021-02-05 10:09:00	300002322041	0	30	1	0			0	0	0	0	0	0
2021-02-05 10:13:00	000830856100	1	50	2	0			0	0	0	0	0	0
2021-02-05 10:18:00	001036376300	0	59	3	0			0	0	0	0	0	0
2021-02-05 10:35:00	000986599600	0	67	4	0			0	0	0	0	0	0
2021-02-05 10:35:00	001097105900	1	42	2	0			0	0	0	0	0	0
2021-02-05 10:40:00	300001152318	0	67	4	0			0	0	0	0	0	0
2021-02-05 11:01:00	300002269258	0	43	2	0			0	0	0	0	0	0
2021-02-05 11:02:00	001080938600	0	47	2	0			0	0	0	0	0	0
2021-02-05 11:07:00	000528126900	1	63	4	0			0	0	0	0	0	0
2021-02-05 11:29:00	500001381946	1	49	2	0			0	0	0	0	0	0
2021-02-05 11:34:00	500000063235	1	30	1	0			0	0	0	0	0	0
2021-02-05 13:58:00	500001381937	0	49	2	0			0	0	0	0	0	0
2021-02-05 14:04:00	500000144986	1	32	1	0			0	0	0	0	0	0
2021-02-05 14:04:00	500001371563	1	57	3	0			0	0	0	0	0	0
2021-02-05 14:07:00	300002484567	0	37	1	0			0	0	0	0	0	0
2021-02-05 14:08:00	300002726990	0	32	1	0			0	0	0	0	0	0
2021-02-05 14:12:00	300000322446	1	45	2	0			0	0	0	0	0	0
2021-02-05 14:14:00	300001302106	0	36	1	1	1		1	0	0	0	0	0
2021-02-05 14:17:00	300002817516	1	52	3	0			0	0	0	0	0	0
2021-02-05 14:18:00	500001378894	1	51	3	0			0	0	0	0	0	0
2021-02-05 14:24:00	300003390208	1	48	2	0			0	0	0	0	0	0
2021-02-05 14:27:00	300002783643	0	52	3	0			0	0	0	0	0	0
2021-02-05 14:27:00	13233189	1	41	2	0			0	0	0	0	0	0
2021-02-05 14:27:00	11641033	1	47	2	0			0	0	0	0	0	0
2021-02-05 14:30:00	500001378867	1	58	3	0			0	0	0	0	0	0
2021-02-05 14:33:00	500001379675	0	39	1	0			0	0	0	0	0	0
2021-02-05 14:35:00	300001164623	0	45	2	0			0	0	0	0	0	0
2021-02-05 14:36:00	300002214549	0	36	1	0			0	0	0	0	0	0
2021-02-05 14:38:00	300003259665	1	61	4	0			0	0	0	0	0	0
2021-02-05 14:42:00	300000824094	1	57	3	0			0	0	0	0	0	0
2021-02-05 14:42:00	500000432412	0	44	2	0			0	0	0	0	0	0
2021-02-05 14:43:00	300002573647	0	57	3	0			0	0	0	0	0	0
2021-02-05 14:48:00	500000818786	0	46	2	0			0	0	0	0	0	0
2021-02-05 14:54:00	300000979838	1	38	1	0			0	0	0	0	0	0
2021-02-05 14:54:00	300003589388	0	41	2	0			0	0	0	0	0	0
2021-02-05 15:00:00	13662511	1	41	2	0			0	0	0	0	0	0
2021-02-05 15:02:00	500001381120	0	39	1	0			0	0	0	0	0	0
2021-02-05 15:02:00	500001381205	0	47	2	0			0	0	0	0	0	0
2021-02-05 15:05:00	500001381204	0	55	3	0			0	0	0	0	0	0
2021-02-05 15:07:00	300001622905	1	49	2	0			0	0	0	0	0	0
2021-02-05 15:09:00	500001381131	1	37	1	0			0	0	0	0	0	0
2021-02-05 15:11:00	300003275189	1	55	3	0			0	0	0	0	0	0
2021-02-05 15:11:00	500000206221	0	54	3	0			0	0	0	0	0	0
2021-02-05 15:11:00	300003323367	0	45	2	0			0	0	0	0	0	0
2021-02-05 15:16:00	500001270619	1	63	4	0			0	0	0	0	0	0
2021-02-05 15:16:00	500001114614	1	44	2	0			0	0	0	0	0	0
2021-02-05 15:19:00	500001232485	1	64	4	0			0	0	0	0	0	0
2021-02-05 15:19:00	300003013232	0	39	1	0			0	0	0	0	0	0
2021-02-05 15:20:00	300000517125	0	40	1	0			0	0	0	0	0	0
2021-02-05 15:26:00	500001359403	0	66	4	0			0	0	0	0	0	0
2021-02-05 15:26:00	500000158696	1	53	3	0			0	0	0	0	0	0
2021-02-05 15:27:00	500001382253	1	43	2	0			0	0	0	0	0	0
2021-02-05 15:35:00	500001378017	1	43	2	0			0	0	0	0	0	0
2021-02-05 15:36:00	500001381539	0	40	1	0			0	0	0	0	0	0
2021-02-05 15:36:00	300003245277	0	42	2	0			0	0	0	0	0	0
2021-02-05 15:39:00	13713283	0	66	4	0			0	0	0	0	0	0
2021-02-05 15:39:00	500001381667	0	54	3	0			0	0	0	0	0	0
2021-02-05 15:42:00	500001382526	1	20	1	0			0	0	0	0	0	0
2021-02-05 15:43:00	500000863428	0	22	1	0			0	0	0	0	0	0
2021-02-05 15:45:00	300003306122	1	64	4	1	1	1	1	1	1	1	1	1
2021-02-05 15:47:00	500000766116	0	39	1	0			0	0	0	0	0	0
2021-02-05 15:49:00	300002644042	1	69	4	0			0	0	0	0	0	0
2021-02-05 15:54:00	300003503014	0	42	2	0			0	0	0	0	0	0
2021-02-05 15:55:00	500001377515	0	53	3	0			0	0	0	0	0	0
2021-02-05 15:58:00	500001378986	1	54	3	0			0	0	0	0	0	0
2021-02-05 15:58:00	500001380925	1	28	1	0			0	0	0	0	0	0
2021-02-05 16:03:00	300003495040	1	52	3	0			0	0	0	0	0	0
2021-02-05 16:05:00	300003276530	0	25	1	0			0	0	0	0	0	0
2021-02-05 16:08:00	500001378798	1	34	1	0			0	0	0	0	0	0
2021-02-05 16:09:00	300002125151	1	68	4	0			0	0	0	0	0	0
2021-02-05 16:46:00	500000205319	1	50	2	0			0	0	0	0	0	0
2021-02-07 07:58:00	300003076712	1	44	2	0			0	0	0	0	0	0
2021-02-07 08:01:00	500001384044	1	44	2	0			0	0	0	0	0	0
2021-02-07 08:26:00	300001411857	1	53	3	0			0	0	0	0	0	0
2021-02-07 08:29:00	001099564100	0	55	3	0			0	0	0	0	0	0
2021-02-07 08:33:00	001109848400	1	32	1	0			0	0	0	0	0	0
2021-02-07 08:42:00	500000423808	0	58	3	0			0	0	0	0	0	0
2021-02-07 08:43:00	300002644979	1	30	1	0			0	0	0	0	0	0
2021-02-07 08:48:00	000669316900	1	27	1	0			0	0	0	0	0	0
2021-02-07 08:53:00	500001204801	0	33	1	0			0	0	0	0	0	0
2021-02-07 08:59:00	300003097159	1	44	2	0			0	0	0	0	0	0
2021-02-07 09:03:00	500001382626	0	41	2	0			0	0	0	0	0	0
2021-02-07 09:05:00	300001687059	1	47	2	0			0	0	0	0	0	0
2021-02-07 09:17:00	001108232400	1	40	1	0			0	0	0	0	0	0
2021-02-07 09:22:00	001109620900	1	53	3	0			0	0	0	0	0	0
2021-02-07 09:22:00	001109335000	0	42	2	0			0	0	0	0	0	0
2021-02-07 09:23:00	001108954100	0	69	4	0			0	0	0	0	0	0
2021-02-07 09:32:00	300001818207	1	53	3	0			0	0	0	0	0	0
2021-02-07 09:41:00	001109669900	1	55	3	0			0	0	0	0	0	0
2021-02-07 09:44:00	001108498300	0	40	1	0			0	0	0	0	0	0
2021-02-07 09:59:00	500000775893	1	46	2	0			0	0	0	0	0	0
2021-02-07 10:11:00	300000429657	1	47	2	0			0	0	0	0	0	0
2021-02-07 10:15:00	001108848300	1	51	3	1	1		0	1	1	0	0	0
2021-02-07 10:19:00	500001385197	0	31	1	0			0	0	0	0	0	0
2021-02-07 10:34:00	001109021800	1	68	4	0			0	0	0	0	0	0
2021-02-07 10:39:00	500001359152	1	32	1	0			0	0	0	0	0	0
2021-02-07 13:58:00	300002390427	0	53	3	1	1		1	0	0	0	0	0
2021-02-07 14:00:00	500001376739	0	65	4	0			0	0	0	0	0	0
2021-02-07 14:00:00	500001385136	1	28	1	0			0	0	0	0	0	0
2021-02-07 14:01:00	500001382952	0	52	3	0			0	0	0	0	0	0
2021-02-07 14:03:00	300003082888	1	46	2	0			0	0	0	0	0	0
2021-02-07 14:05:00	500001383349	1	63	4	0			0	0	0	0	0	0
2021-02-07 14:06:00	300002679614	0	29	1	0			0	0	0	0	0	0
2021-02-07 14:18:00	10546686	1	38	1	0			0	0	0	0	0	0
2021-02-07 14:19:00	300001974497	1	46	2	0			0	0	0	0	0	0
2021-02-07 14:25:00	500001127468	0	33	1	0			0	0	0	0	0	0
2021-02-07 14:27:00	300003299391	1	55	3	0			0	0	0	0	0	0
2021-02-07 14:31:00	300003572476	0	34	1	0			0	0	0	0	0	0
2021-02-07 14:32:00	300002259299	0	58	3	0			0	0	0	0	0	0
2021-02-07 14:33:00	500000844662	0	51	3	0			0	0	0	0	0	0
2021-02-07 14:36:00	300000674315	0	61	4	0			0	0	0	0	0	0
2021-02-07 14:37:00	300001965602	1	65	4	0			0	0	0	0	0	0
2021-02-07 14:38:00	500001385143	1	53	3	0			0	0	0	0	0	0
2021-02-07 14:42:00	300001052187	1	43	2	0			0	0	0	0	0	0
2021-02-07 14:43:00	500001087416	0	54	3	0			0	0	0	0	0	0
2021-02-07 14:49:00	300000465598	0	52	3	0			0	0	0	0	0	0
2021-02-07 14:50:00	500000911607	0	32	1	0			0	0	0	0	0	0
2021-02-07 14:50:00	500000819982	0	22	1	0			0	0	0	0	0	0
2021-02-07 14:52:00	500001021033	0	33	1	0			0	0	0	0	0	0
2021-02-07 14:58:00	300002379174	0	55	3	0			0	0	0	0	0	0
2021-02-07 14:59:00	300003155071	1	42	2	0			0	0	0	0	0	0
2021-02-07 15:02:00	300002759288	0	43	2	0			0	0	0	0	0	0
2021-02-07 15:06:00	500001239039	0	27	1	0			0	0	0	0	0	0
2021-02-07 15:06:00	300000593144	1	54	3	0			0	0	0	0	0	0
2021-02-07 15:07:00	300003424497	0	34	1	0			0	0	0	0	0	0
2021-02-07 15:09:00	500000468107	0	49	2	0			0	0	0	0	0	0
2021-02-07 15:14:00	500000142264	1	48	2	0			0	0	0	0	0	0
2021-02-07 15:14:00	300002412868	0	21	1	0			0	0	0	0	0	0
2021-02-07 15:18:00	300002234561	1	46	2	0			0	0	0	0	0	0
2021-02-07 15:25:00	500000132881	1	56	3	0			0	0	0	0	0	0
2021-02-07 15:43:00	300002916506	0	43	2	0			0	0	0	0	0	0
2021-02-08 08:00:00	500001387514	0	37	1	1	1		0	1	0	0	0	0
2021-02-08 08:01:00	000770705700	0	69	4	0			0	0	0	0	0	0
2021-02-08 08:06:00	001109945900	1	64	4	0			0	0	0	0	0	0
2021-02-08 08:07:00	500000885535	0	44	2	0			0	0	0	0	0	0
2021-02-08 08:10:00	500001384693	0	61	4	0			0	0	0	0	0	0
2021-02-08 08:17:00	500001387005	0	29	1	0			0	0	0	0	0	0
2021-02-08 08:26:00	500000498692	0	41	2	0			0	0	0	0	0	0
2021-02-08 08:27:00	12460872	1	57	3	0			0	0	0	0	0	0
2021-02-08 08:39:00	300003140370	1	26	1	0			0	0	0	0	0	0
2021-02-08 08:46:00	500000198993	0	56	3	0			0	0	0	0	0	0
2021-02-08 08:53:00	500001235874	1	27	1	0			0	0	0	0	0	0
2021-02-08 08:55:00	300002864627	1	28	1	0			0	0	0	0	0	0
2021-02-08 09:00:00	001109510600	0	70	4	1	1		1	0	0	0	0	0
2021-02-08 09:04:00	300002622645	0	42	2	0			0	0	0	0	0	0
2021-02-08 09:08:00	001040155000	1	64	4	0			0	0	0	0	0	0
2021-02-08 09:09:00	001105441800	1	55	3	0			0	0	0	0	0	0
2021-02-08 09:15:00	000892853500	1	65	4	0			0	0	0	0	0	0
2021-02-08 09:25:00	300003040215	0	43	2	0			0	0	0	0	0	0
2021-02-08 09:29:00	500001374661	1	46	2	0			0	0	0	0	0	0
2021-02-08 09:30:00	001109292100	1	43	2	0			0	0	0	0	0	0
2021-02-08 09:41:00	000909929100	0	57	3	0			0	0	0	0	0	0
2021-02-08 09:46:00	500001387010	0	67	4	0			0	0	0	0	0	0
2021-02-08 09:46:00	500001387504	0	52	3	1	1		1	0	0	0	0	0
2021-02-08 10:12:00	300002404780	0	40	1	0			0	0	0	0	0	0
2021-02-08 11:27:00	001108867800	0	58	3	0			0	0	0	0	0	0
2021-02-08 14:01:00	300003111386	0	63	4	0			0	0	0	0	0	0
2021-02-08 14:02:00	500001058957	0	33	1	0			0	0	0	0	0	0
2021-02-08 14:05:00	500001382341	1	51	3	0			0	0	0	0	0	0
2021-02-08 14:08:00	500001305215	1	60	3	0			0	0	0	0	0	0
2021-02-08 14:09:00	500001368767	0	44	2	0			0	0	0	0	0	0
2021-02-08 14:12:00	500000844840	0	44	2	0			0	0	0	0	0	0
2021-02-08 14:15:00	300001578545	1	37	1	0			0	0	0	0	0	0
2021-02-08 14:20:00	500001384719	0	25	1	0			0	0	0	0	0	0
2021-02-08 14:21:00	500001386486	1	51	3	0			0	0	0	0	0	0
2021-02-08 14:21:00	300002835833	1	60	3	0			0	0	0	0	0	0
2021-02-08 14:24:00	300003597357	1	66	4	0			0	0	0	0	0	0
2021-02-08 14:28:00	500000541328	1	52	3	0			0	0	0	0	0	0
2021-02-08 14:28:00	300003032727	0	60	3	1	1		0	1	0	0	0	0
2021-02-08 14:34:00	300003035529	0	57	3	0			0	0	0	0	0	0
2021-02-08 14:36:00	300002999869	0	56	3	0			0	0	0	0	0	0
2021-02-08 14:37:00	500001100186	0	44	2	0			0	0	0	0	0	0
2021-02-08 14:38:00	300003573904	0	52	3	0			0	0	0	0	0	0
2021-02-08 14:51:00	500001372908	1	36	1	0			0	0	0	0	0	0
2021-02-08 14:51:00	500001387014	1	46	2	0			0	0	0	0	0	0
2021-02-08 14:57:00	500000932904	1	58	3	0			0	0	0	0	0	0
2021-02-08 14:58:00	500000666335	0	49	2	0			0	0	0	0	0	0
2021-02-08 14:59:00	500001308517	0	70	4	0			0	0	0	0	0	0
2021-02-08 15:00:00	300003083523	1	28	1	0			0	0	0	0	0	0
2021-02-08 15:01:00	500000808179	0	36	1	0			0	0	0	0	0	0
2021-02-08 15:02:00	300002630020	1	65	4	0			0	0	0	0	0	0
2021-02-08 15:05:00	300001939672	1	48	2	0			0	0	0	0	0	0
2021-02-08 15:07:00	500000178830	0	42	2	0			0	0	0	0	0	0
2021-02-08 15:16:00	500000511184	0	52	3	0			0	0	0	0	0	0
2021-02-08 15:18:00	300003412785	0	32	1	0			0	0	0	0	0	0
2021-02-08 15:19:00	300003023314	0	47	2	0			0	0	0	0	0	0
2021-02-08 15:23:00	300003454000	1	57	3	0			0	0	0	0	0	0
2021-02-08 15:25:00	300001184208	1	32	1	0			0	0	0	0	0	0
2021-02-08 15:28:00	300001758720	0	49	2	0			0	0	0	0	0	0
2021-02-08 15:28:00	500001387259	0	30	1	0			0	0	0	0	0	0
2021-02-08 15:31:00	500000703998	1	55	3	0			0	0	0	0	0	0
2021-02-08 15:33:00	300003078151	1	31	1	0			0	0	0	0	0	0
2021-02-08 15:33:00	500001386473	1	45	2	0			0	0	0	0	0	0
2021-02-08 15:48:00	500000930243	1	30	1	0			0	0	0	0	0	0
2021-02-08 15:48:00	300002923329	1	45	2	0			0	0	0	0	0	0
2021-02-08 15:52:00	300000466078	0	31	1	0			0	0	0	0	0	0
2021-02-08 15:53:00	500001387108	1	37	1	0			0	0	0	0	0	0
2021-02-08 16:24:00	300002200000	0	56	3	0			0	0	0	0	0	0
[truncated: 54,309 more rows]
